# 1 **Population structure of modern-day Italians reveals patterns of ancient** 2 **and archaic ancestries in Southern Europe**

3 A. Raveane<sup>1,2\*†</sup>, S. Aneli<sup>2,3,4\*†</sup>, F. Montinaro<sup>2,5\*†</sup>, G. Athanasiadis<sup>6</sup>, S. Barlera<sup>7</sup>, G. Birolo<sup>3,4</sup>, G.  
4 Boncoraglio<sup>8,9</sup>, AM. Di Blasio<sup>10</sup>, C. Di Gaetano<sup>3,4</sup>, L. Pagani<sup>5,11</sup>, S. Parolo<sup>12</sup>, P. Paschou<sup>13</sup>, A.  
5 Piazza<sup>3,14</sup>, G. Stamatoyannopoulos<sup>15</sup>, A. Angius<sup>16</sup>, N. Brucato<sup>17</sup>, F. Cucca<sup>16</sup>, G. Hellenthal<sup>18</sup>, A.  
6 Mulas<sup>19</sup>, M. Peyret-Guzzon<sup>20</sup>, M. Zoledziewska<sup>16</sup>, A. Baali<sup>21</sup>, C. Bycroft<sup>20</sup>, M. Cherkaoui<sup>21</sup>, C.  
7 Dina<sup>22</sup>, JM. Dugoujon<sup>17</sup>, P. Galan<sup>23</sup>, J. Gienza<sup>22</sup>, T. Kivisild<sup>5,24</sup>, M. Melhaoui<sup>25</sup>, M. Metspalu<sup>5</sup>, S.  
8 Myers<sup>20</sup>, LM. Pereira<sup>26</sup>, FX. Ricaut<sup>17</sup>, F. Brisighelli<sup>27</sup>, I. Cardinali<sup>28</sup>, V. Grugni<sup>1</sup>, H. Lancioni<sup>28</sup>, V.  
9 L. Pascali<sup>27</sup>, A. Torroni<sup>1</sup>, O. Semino<sup>1</sup>, G. Matullo<sup>3,4†</sup>, A. Achilli<sup>1†</sup>, A. Olivieri<sup>1†</sup>, C. Capelli<sup>2\*†</sup>

10  
11 1 Department of Biology and Biotechnology "L. Spallanzani", University of Pavia, Pavia, Italy.

12 2 Department of Zoology, University of Oxford, Oxford, UK.

13 3 Department of Medical Sciences, University of Turin, Turin, Italy.

14 4 IIGM (Italian Institute for Genomic Medicine), Turin.

15 5 Estonian Biocentre, Institute of Genomics, University of Tartu, Tartu, Estonia.

16 6 Bioinformatics Research Centre, Aarhus University, Aarhus, Denmark.

17 7 Department of Cardiovascular Research, Istituto di Ricovero e Cura a Carattere Scientifico–  
18 Istituto di Ricerche Farmacologiche Mario Negri, Milan, Italy.

19 8 Department of Cerebrovascular Diseases, IRCCS Istituto Neurologico Carlo Besta, Milan, Italy.

20 9 PhD Program in Neuroscience, University Milano-Bicocca, Monza, Italy.

21 10 Center for Biomedical Research & Technologies, Italian Auxologic Institute IRCCS, Milan,  
22 Italy.

23 11 APE lab, Department of Biology, University of Padua, Padua, Italy.

- 24 12 Computational Biology Unit, Institute of Molecular Genetics, National Research Council,  
25 Pavia, Italy.
- 26 13 Department of Biological Sciences, Purdue University, USA; 14 Academy of Sciences, Turin,  
27 Italy.
- 28 15 Department of Medicine and Genome Sciences, University of Washington, Seattle, WA.
- 29 16 Istituto di Ricerca Genetica e Biomedica, Consiglio Nazionale delle Ricerche (CNR),  
30 Monserrato, Cagliari, Italy.
- 31 17 Evolutionary Medicine Group, Laboratoire d'Anthropologie Moléculaire et Imagerie de  
32 Synthèse, Centre National de la Recherche Scientifique (CNRS), Université de Toulouse,  
33 Toulouse, France.
- 34 18 University College London Genetics Institute (UGI), University College London, London,  
35 UK.
- 36 19 Istituto di Ricerca Genetica e Biomedica (IRGB), CNR, Lanusei, Italy.
- 37 20 The Wellcome Trust Centre for Human Genetics, University of Oxford, Oxford, UK.
- 38 21 Faculté des Sciences Semlalia de Marrakech (FSSM), Université Cadi Ayyad, Marrakech,  
39 Morocco.
- 40 22 l'institut du thorax, INSERM, CNRS, University of Nantes, Nantes, France.
- 41 23 Equipe de Recherche en Epidémiologie Nutritionnelle (EREN), Centre de Recherche en  
42 Epidémiologie et Statistiques, Université Paris 13/Inserm U1153/Inra U1125/ Cnam, COMUE  
43 Sorbonne Paris Cité, F-93017 Bobigny, France.
- 44 24 Division of Biological Anthropology, University of Cambridge, Cambridge, UK.
- 45 25 Faculté des Sciences, Université Mohammed Premier, Oujda, Morocco.
- 46 26 Instituto de Investigação e Inovação em Saúde, Universidade do Porto, Porto, Portugal.

47 27 Section of Legal Medicine, Institute of Public Health, Catholic University of the Sacred Heart,  
48 Rome, Italy.

49 28 Department of Chemistry, Biology and Biotechnology, University of Perugia, Perugia, Italy.

## 50 **Author List Footnotes**

51 \* corresponding author

52 † These authors contributed equally to this work

53 ‡ Co-senior authors

## 54 **Contact Info**

55 \* Correspondence: [alessandro.raveane01@universitadipavia.it](mailto:alessandro.raveane01@universitadipavia.it) (A.R.), [serena.aneli@gmail.com](mailto:serena.aneli@gmail.com)  
56 (S.A.), [francesco.montinaro@gmail.com](mailto:francesco.montinaro@gmail.com) (F.M.) and [cristian.capelli@zoo.ox.ac.uk](mailto:cristian.capelli@zoo.ox.ac.uk) (C.C.).

57

58 **One sentence summary.** Ancient and historical admixture events shaped the genetic structure of  
59 modern-day Italians, the ancestry profile of Southern European populations and the continental  
60 distribution of Neanderthal legacy.

61

## 62 **Abstract**

63 European populations display low genetic diversity as the result of long term blending of the small  
64 number of ancient founding ancestries. However it is still unclear how the combination of ancient  
65 ancestries related to early European foragers, Neolithic farmers and Bronze Age nomadic  
66 pastoralists can fully explain genetic variation across Europe. Populations in natural crossroads like  
67 the Italian peninsula are expected to recapitulate the overall continental diversity, but to date have  
68 been systematically understudied. Here we characterised the ancestry profiles of modern-day Italian  
69 populations using a genome-wide dataset representative of modern and ancient samples from across  
70 Italy, Europe and the rest of the world. Italian genomes captured several ancient signatures,  
71 including a non-steppe related substantial ancestry contribution ultimately from the Caucasus.

72 Differences in ancestry composition as the result of migration and admixture generated in Italy the  
73 largest degree of population structure detected so far in the continent and shaped the amount of  
74 Neanderthal DNA present in modern-day populations.

## 75 76 **Introduction**

77 Our understanding of the events that shaped European genetic variation has been redefined by the  
78 availability of ancient DNA (aDNA). In particular, it has emerged that, in addition to the  
79 contributions of early hunter-gatherer populations, major genetic components can be traced back to  
80 Neolithic (1–4) and Bronze Age expansions (3, 5).

81 The arrival of farming in Europe from Anatolia led to a partial replacement via admixture of  
82 autochthonous and geographically structured hunter-gatherers, a process that generated individuals  
83 genetically close to present-day Sardinians (2, 4, 6, 7). During the Bronze Age the dispersal of a  
84 population related to the pastoralist nomadic Yamnaya from the Pontic-Caspian steppe area  
85 dramatically impacted the genetic landscape of the continent, particularly of Northern and Central  
86 Europe (3, 5, 8). This migration, supported by archaeological and genetic data, has also been  
87 putatively linked to the spread of the Indo-European languages in Europe and the introduction of  
88 several technological innovations in peninsular Eurasia (9). Genetically, ancient steppe populations  
89 have been described as a combination of Eastern and Caucasus Hunter Gatherer/Iran Neolithic  
90 ancestries (EHG and CHG/IN) (6), whose genetic signatures in the population of Central and  
91 Northern Europe were introduced via admixture. However, the analysis of aDNA from Southern  
92 East Europe identified the existence of additional contributions ultimately from the Caucasus (10,  
93 11) and suggested a more complex ancient ancestry composition for Europeans (6).

94 The geographic location of Italy, enclosed between continental Europe and the Mediterranean  
95 Sea, makes the Italian people relevant for the investigation of continent-wide demographic events,  
96 to complement and enrich the information provided by aDNA studies. In order to characterise the  
97 ancestry profile of modern-day populations and test the validity of the three-ancestries model

98 across Europe (related to early European foragers, Neolithic farmers and Bronze Age nomadic  
99 pastoralists), we characterised the genetic variability of present-day Italians and other Europeans  
100 in terms of their ancient ancestry composition as the result of migration and admixture. In doing  
101 so, we assembled and analyzed a comprehensive genome-wide SNP dataset composed by 1,616  
102 individuals from all the 20 Italian administrative regions and more than 140 worldwide reference  
103 populations, for a total of 5,192 modern-day samples (fig. S1, table S1), to which we added  
104 genomic data available for ancient individuals (data file S1).

## 105 **Results**

### 106 *Distinctive genetic structure in Italy*

107 We initially investigated patterns of genetic differentiation in Italy and surrounding regions by  
108 exploring the information embedded in SNP-based haplotypes of modern samples (Full Modern  
109 Dataset, FMD, including 218,725 SNPs). The phased genome-wide dataset was analysed using the  
110 CHROMOPAINTER (CP) and fineSTRUCTURE (fS) pipeline (12, 13) (Supplementary materials)  
111 to generate a tree of groups of individuals with similar “copying vectors” (clusters, Fig. 1A). The  
112 fraction of pairs of individuals placed in the same cluster across multiple runs was on average 0.95  
113 for Italian clusters and 0.96 across the whole set of clusters (see Materials and Methods,  
114 Supplementary materials). Related non-European clusters were merged into larger groups in  
115 subsequent analyses (see Materials and Methods, Supplementary materials).

116 Italian clusters separated into three main groups: Sardinia, Northern (North/Central-North Italy)  
117 and Southern Italy (South/Central-South Italy and Sicily); the former two were close to populations  
118 originally from Western Europe, while the latter was in proximity of Middle East groups (Fig. 1A,  
119 fig. S2, data file S2). The cluster-composition of the administrative regions of Italy provided further  
120 evidence for geographic structuring (Fig. 1B) with the separation between Northern and Southern  
121 areas being shifted North along the peninsula; the affinity to Western and Middle Eastern  
122 populations was also evident in the haplotype-based PCA (Fig. 1C), allele frequency PCA (fig. S3)  
123 and the ADMIXTURE analysis (fig. S4).

124 These observations were replicated using a subset of the dataset genotyped for a larger number of  
125 SNPs (High Density Dataset, HDD, including 591,217 SNPs; see Materials and Methods,  
126 Supplementary materials, Fig. 1B, table S1). Recent migrants and admixed individuals, as identified  
127 on the basis of their copying vectors (fig. S5, fig. S6, table S2), were removed in subsequent CP/fS  
128 analyses (see Supplementary materials).

129 We explored the degree of within-country differentiation by comparing the distribution of  $F_{ST}$   
130 values among fS genetic clusters in Italy with the ones in several European countries (13–16) and  
131 across the whole of Europe. Clusters within Italy were significantly more different from each other  
132 than within any other country here included (median Italy: 0.004, data file S3; range medians for  
133 listed countries 0.0001–0.002) and showed differences comparable with estimates across European  
134 clusters (median European clusters: 0.004, Fig. 1D, see Materials and Methods, Supplementary  
135 materials). The analysis of the migration surfaces (EEMS) (17) highlighted several barriers to gene  
136 flow within and around Italy but also suggested the existence of migration corridors in the southern  
137 part of the Adriatic and Ionian Sea, and between Sardinia, Corsica and continental Italy (Fig. 1E;  
138 fig. S7) (11).

### 139 ***Multiple ancient ancestries in Italian clusters***

140 We investigated the ancestry composition of modern clusters by testing different combination of  
141 ancient samples using the CP/NNLS pipeline, a previously implemented analysis that reconstructs  
142 the profiles of modern populations as the combination of the “painted” profiles of different ancient  
143 samples by using a “mixture fit” approach based on a non-negative least square algorithm (NNLS)  
144 (13, 18, 19). We applied this approach to ancient samples using the unlinked mode implemented in  
145 CP, similarly to other routinely performed analyses based on unlinked markers or allele frequency,  
146 such as qpAdm and ADMIXTURE. In addition, data from modern individuals (FMD) were  
147 harnessed as donor populations (see Materials and Methods, Supplementary materials). Following  
148 Lazaridis et. al 2017 (10), we performed two separate CP/NNLS analyses, “*Ultimate*” and  
149 “*Proximate*”, referring to the least and the most recent putative sources, respectively (Fig. 2, fig.  
150 S8, fig. S9). In the *Ultimate* analysis, all the Italian clusters were characterised by relatively high  
151 amounts of Anatolian Neolithic (AN), ranging between 56% (SIItaly1) and 72% (NIItaly4),  
152 distributed along a North-South cline (Spearman  $\rho = 0.52$ , p-value < 0.05; Fig. 2A-C, fig. S8A),  
153 with Sardinians showing values above 80%. A closer affinity of Northern Italian than Southern

154 Italian clusters to AN was also supported by D-statistics (fig. S10). The remaining ancestry was  
155 mainly assigned to WHG (Western Hunter-Gatherer), CHG and EHG. In particular, the first two  
156 components were more present in populations from the South (higher estimates in SItaly1 ~13%  
157 and SItaly3 ~ 24% for WHG and CHG respectively), while the latter was more common in Northern  
158 clusters (NItaly6 = 15%). These observations suggest the existence of different secondary sources  
159 contributions to the two edges of the peninsulas, with the North affected more by EHG-related  
160 populations and the South affected more by CHG-related groups. Iran Neolithic (IN) ancestry was  
161 detected in Europe only in Southern Italy.

162 North-South differences across Italy were also detected in the *Proximate* analysis. When *Proximate*  
163 sources were evaluated, SBA contribution ranged between 33% in the North and 6% in the South  
164 of Italy, while ABA (Anatolia Bronze Age) showed an opposite distribution (Fig. 2D-F, fig. S9), in  
165 line with the results based on the D statistics (fig. S10, fig. S11), and mirroring the EHG and CHG  
166 patterns, respectively. Contrary to previous reports, the occurrence of CHG as detected by the  
167 CP/NNLS analysis did not mirror the presence of Steppe Bronze Age (SBA), with several  
168 populations testing positive for the latter but not for the former ((6), Fig. 2, fig. S8). We therefore  
169 speculate that our approach might in general underestimate the presence of CHG across the  
170 continent; however, we note that even considering this scenario, the excess of Caucasus related  
171 ancestry detected in the South of the European continent, and in Southern Italy in particular, is  
172 striking and unexplained by currently proposed models for the peopling of the continent.

173 Interestingly, clusters belonging to the North had more EEN (European Early Neolithic) than  
174 Southern ones, which in turn were composed by an higher fraction of ABA, although the high AN-  
175 related component in both these ancient groups might have affected the exact source identification.  
176 The relevance of ABA in Italy was additionally supported by the reduced fit of the NNLS (sum of  
177 the squared residuals; Materials and Methods, Supplementary materials) when the *Proximate*  
178 analysis was run excluding ABA. Results were similar to the full *Proximate* analysis for most of



179 the European clusters, but not for Southern European groups, where the residuals were almost up  
180 to twice as much when ABA was not included as a source (Fig. 2G). A similar behaviour, but for  
181 Northern Italian and most of the European clusters, was observed when SBA was removed from  
182 the panel of *Proximate* sources (Fig. 2H). The closer affinity of the Southern Italian clusters to ABA  
183 was also highlighted by the PCA and ADMIXTURE analysis on ancient and modern samples (Fig.  
184 2I, fig. S12, fig. S13, fig. S14) and significantly higher ABA ancestry in Southern than Northern  
185 Italy, as estimated by NNLS analysis (Fig. 2D, Student's t-Test p-value < 0.05, Supplementary  
186 materials). We also noted that in the Balkan peninsula signatures related to ABA were present but  
187 less evident than in Southern Italy across modern-day populations, possibly masked by historical  
188 contributions from Central Europe (20, 21) (Fig. 2, Fig. 3, fig. S8B). Overall, SBA and ABA appear  
189 to have very different distribution patterns in Europe: continent-wide the former, more localised (in  
190 the South) the latter. Similar results were obtained when other Southern European ancient sources  
191 replaced ABA in the Proximate analysis (fig. S9, Materials and Methods, Supplementary materials).  
192 These results were confirmed by qpAdm analysis. When two sources were evaluated, a large AN  
193 contribution was supported only in one cluster (SIItaly2), while the vast majority of supported  
194 models included ABA, Minoan or Mycenaean and one of the hunter-gatherer groups or SBA (table  
195 S3, table S4). When three possible sources were allowed, AN was supported for all the Southern  
196 Italian clusters, mostly in association with EHG/WHG/SBA and CHG/IN. Nevertheless, all the  
197 analysed clusters, could be modelled as a combination of ABA, SBA and European Middle-  
198 Neolithic/Chalcolithic, their contributions mirroring the pattern observed in the CP/NNLS analysis  
199 (fig. S15, table S3, table S4). North African contributions, ranging between 3.8% (SCIItaly1) to  
200 14.5% (SIItaly1) became evident when combinations of five sources were tested. Sardinian clusters  
201 were consistently modeled as AN+WHG+CHG/IN across runs, with the inclusion of North Africa  
202 and SBA when different number of sources were considered. The qpAdm analyses of Italian HDD  
203 clusters generated similar results (Materials and Methods, Supplementary materials, table S4). In

204 order to obtain insights about the relationship between ancient and modern groups, we performed  
205 the same qpAdm analysis on post-Neolithic/Bronze Age Italian individuals (fig. S15, table S5).  
206 Iceman and Remedello, the oldest Italian samples here included (3,400-2,800 BCE, Before Current  
207 Era), were composed by high proportions of AN (74 and 85%, respectively). The Bell Beaker  
208 samples of Northern Italy (2,200-1,930 BCE) were modelled as ABA and AN + SBA and WHG,  
209 although ABA was characterised by large standard errors but the detection of Steppe ancestry, at  
210 14%, was more robust. On the other hand Bell Beaker samples from Sicily (2,500-1,900 BCE) were  
211 modelled almost exclusively as ABA, with less than 5% SBA. Despite the fact that the small  
212 number of SNPs and prehistoric individuals tested prevents the formulation of conclusive results,  
213 differences in the occurrence of AN ancestry, and possibly also Bronze Age related contributions,  
214 are suggested to be present between ancient samples from North and South Italy. Differences across  
215 ancient Italian samples were also supported by their projections on the PCA of modern-day data  
216 (Fig. 2I). Remedello and Iceman clustered with European Early Neolithic samples, together with  
217 one of the three Bell Beaker individuals from North Italy, as previously reported (22), and modern-  
218 day Sardinians. The other two Bronze Age North Italian samples clustered with modern North  
219 Italians, while the Bell Beaker sample from Sicily was projected in between European Early  
220 Neolithic, Bronze Age Southern European and modern-day Italian samples (Fig. 2I).

### 221 *Historical admixture*

222 In order to investigate the role of historical admixture events in shaping the modern distribution of  
223 ancient ancestries, we generated the admixture profiles of Italian and European populations using  
224 GLOBETROTTER (GT, (21)) (Fig. 3, fig. S16, table S6, table S7).

225 We discussed here the results based on the full modern dataset (FMD) as it provided a wider  
226 coverage at population level.

227 We run the analysis excluding the Italians as donors in order to reduce copying between highly  
228 similar groups (GT “noItaly” analysis; Fig. 3). The events detected in Italy occurred mostly between

229 1,000 and 2,000 years ago (ya), and extended to 2,500ya in the rest of Europe (Fig. 3A and fig.  
230 S16). Clusters from Caucasus and North-West Europe were identified all across Italy as best-  
231 proxies for the admixing sources, while Middle Eastern and African clusters were identified as best  
232 proxies only in Southern Italian clusters and Sardinia (Fig. 3B, C). We noted that when we extended  
233 the search for the best-proxies to include also Italian clusters, these were as good as or better proxies  
234 than clusters from the Caucasus and the Middle East. On the other hand, North-West European and  
235 African clusters were usually still better proxies than groups from any other area (Fig. 3B, C).  
236 Notably, Eastern and Middle Eastern clusters were not detected as best proxies when we run the  
237 GT analysis including all clusters as donors, contrary to African, European and Italian groups  
238 (“GTall” analysis; table S6). Overall these results supported a scenario in which gene flow mostly  
239 occurred between resident Italian sources and non-Italian sources. SBA and ABA ancestries were  
240 detected in Italian and non-Italian best-proxies (Fig. 2D, Fig. 3, table S6, table S7), which suggests  
241 that part of these ancestries arrived from outside Italy in historical times, but also that these  
242 components were already present in Italian groups at the time of these admixture events. Episodes  
243 of gene flow were also detected in Sardinia, combining signals from both the African continent and  
244 North West Europe. MALDER results for the more recent episodes replicated the admixture pattern  
245 identified by GT (fig. S16, table S8).

### 246 *The Neanderthal legacy across Italy and Europe*

247 The variation in ancestry composition reported across Italy and Europe is expected to influence  
248 other aspects of the genetic profiles of European populations, including the presence of archaic  
249 genetic material (6). We investigated the degree of Neanderthal ancestry in Italian and other  
250 Eurasian populations by focusing on SNPs tagging Neanderthal introgressed regions (23, 24). SNPs  
251 were pruned for LD and a final set of 3,969 SNPs was used to estimate the number of Neanderthal  
252 alleles in samples genotyped for the Infinium Omni2.5-8 Illumina beadchip. Asian and Northern  
253 European populations had significantly more Neanderthal alleles than European and Southern

254 European groups respectively, as previously reported (25–28), with significant differences also  
255 highlighted within Italy (Fig. 4A, B). Contributions from African groups possibly influenced these  
256 patterns, particularly in Southern European populations (20) (Fig. 2, Fig. 3). However differences  
257 within Europe and Italy were still present once individuals belonging to clusters with African  
258 contributions were removed (fig. S17, see Materials and Methods, Supplementary methods).  
259 Ancient samples have been reported to differ in the amount of Neanderthal DNA due to variation  
260 in the presence of a so-called “Basal Eurasian” lineage, stemming from non-Africans before the  
261 separation of Eurasian groups and harbouring only a negligible fraction of Neanderthal ancestry  
262 (6). Consistent with this (6), we found the estimated amounts of Basal Eurasian and Neanderthal to  
263 be negatively correlated across modern day European clusters (Fig. 4C, fig. S18, fig. S19),  
264 irrespective of the removal of all the clusters admixed with African sources (see Materials and  
265 Methods, Supplementary materials; fig. S17).

266 The variation in Neanderthal ancestry was also reflected at specific loci. A total of 144 SNPs were  
267 identified among the Neanderthal-tag SNPs showing the largest differences in allelic frequency in  
268 genome-wide comparisons across Eurasian and African populations (see Materials and Methods,  
269 Supplementary materials - Neanderthal-Tag SNPs within the Top 1% of the genome-wide  
270 distributions of each of the 55 pairwise population comparisons - NTT SNPs; fig. S20). The top 1%  
271 of each distribution was significantly depleted in Neanderthal SNPs (see Materials and Methods,  
272 Supplementary materials, table S9), in agreement with a scenario of Neanderthal mildly deleterious  
273 variants being removed more efficiently in human populations (29–31).

274 The 50 genes containing NTT SNPs were enriched for phenotypes related to facial morphology,  
275 body size, metabolism and muscular diseases (see Materials and Methods, Supplementary  
276 materials, data file S4). A total of 34 NTT SNPs were found to have at least one known phenotypic  
277 association (32, 33) (data file S4). Among these, we found Neanderthal alleles associated with  
278 increased gene expression in testis and in skin after sun exposure (SNPs within the *IP6K3* and

279 *ITPR3* genes), susceptibility to cardiovascular and renal conditions (*AGTRI*), and Brittle cornea  
280 syndrome (*PRDM5*) (24). NTT SNPs between European and Asian/African populations included  
281 previously reported variants in *BNC2* and *SPATA18* genes (23, 34, 35) (see Materials and Methods,  
282 Supplementary materials, Fig. 4D), while 80 NTT SNPs were involved in at least one comparison  
283 between Northern (CEU, GBR and FIN) and Southern European populations (IBS and Italian  
284 groups). Among these SNPs, three mapped to the Neanderthal introgressed haplotype hosting the  
285 *PLA2R1* gene, the archaic allele at these positions reaching frequencies of at least 43% in Northern  
286 European and at most of 35% in Southern European populations (Fig. 4E, F). Ten SNPs showed an  
287 opposite frequency gradient: seven mapped to one Neanderthal introgressed region spanning the  
288 *OR51F1*, *OR51F2* and *OR52R1* genes (Fig. 4E, F), and the other three identified regions hosting  
289 the *AKAP13* gene, within one of the high frequency European Neanderthal introgressed haplotypes  
290 recently reported (36) (Fig. 4E, F).

## 291 **Discussion**

292 The pattern of variation reported across Italian groups appears geographically structured in three  
293 main regions: Southern and Northern Italy and Sardinia. The North-South division in particular  
294 appeared as shaped by the distribution of Bronze Age ancestries with signatures of different  
295 continental hunter-gatherer groups. The results of the analyses of both modern and ancient data  
296 suggest that ancestries related to Caucasus and Eastern hunter-gatherers were possibly initially  
297 brought in Italy by at least two different contributions from the East. Of these, one is the well-  
298 characterised SBA signature ultimately associated with the nomadic groups from the Pontic-  
299 Caspian steppes. This component entered Italy from mainland Europe and was present in the  
300 peninsula in the Bronze Age, as suggested by its presence in Bell Beaker samples from North Italy  
301 (table S5). SBA ancestry continued to arrive from the continent up until historical times (Fig. 3).  
302 The other contribution is ultimately associated with CHG ancestry and affected predominantly the  
303 South of Italy, where it now represents a substantial component of the ancestry profile of local

304 populations. This signature is still uncharacterised in terms of precise dates and origin; however  
305 such ancestry was possibly already present during the Bronze Age in Southern Italy (table S5) and  
306 was further supplemented by historical events (Fig. 3).

307 The very low presence of CHG signatures in Sardinia and in older Italian samples (Remedello and  
308 Iceman) but the occurrence in modern-day Southern Italians might be explained by different  
309 scenarios, not mutually exclusive: 1) population structure among early foraging groups across Italy,  
310 reflecting different affinities to CHG; 2) the presence in Italy of different Neolithic contributions,  
311 characterised by different proportion of CHG-related ancestry; 3) the combination of a post-  
312 Neolithic, prehistoric CHG-enriched contribution with a previous AN-related Neolithic layer; 4) A  
313 substantial historical contribution from Southern East Europe across the whole of Southern Italy.

314 No substantial structure has been highlighted so far in pre-Neolithic Italian samples (8). An arrival  
315 of the CHG-related component in Southern Italy from the Southern part of the Balkan Peninsula is  
316 compatible with the identification of genetic corridors linking the two regions (Figure 1E, (11)) and  
317 the presence of Southern European ancient signatures in Italy (Figure 2). The temporal appearance  
318 of CHG signatures in Anatolia and Southern East Europe in the Late Neolithic/Bronze Age suggests  
319 its relevance for post-Neolithic contributions (37). Additional analyses of aDNA samples from  
320 around this time in Italy are expected to clarify what scenario might be best supported.

321 Historical events possibly involving continental groups at the end of Roman Empire and African  
322 contributions following the establishment of Arab kingdoms in Europe around 1,000 ya (20, 21,  
323 38–40) played a role in further shaping the ancestry profiles of the Italian populations.

324 Despite Sardinia was confirmed as being the most closely related population to Early European  
325 Neolithic farmers (Figure 2D, I), there is no evidence for a simple genetic continuity between the  
326 two groups. Sardinia, and the rest of Italy, experienced in fact historical episodes of gene-flow (4)  
327 (Fig. 2, Fig. 3, table S3, table S4) that contributed to the further dispersal of ancient ancestries and  
328 the introduction of other components, including African ones.

329

330 It has been previously reported that variation in the effective population size might explain  
331 differences in the amount of Neanderthal DNA detected in European and Asian populations (24,  
332 27, 41). Additional Neanderthal introgression events in Asia and gene-flow from populations with  
333 lower Neanderthal ancestry in Europe possibly provide further explanations for differences in  
334 Neanderthal occurrence across populations (42). The spatial heterogeneity of Neanderthal legacy  
335 within Europe here reported appears as the result of ancient and historical events which brought  
336 together in different combinations groups harbouring different amounts of Neanderthal genetic  
337 material. While these events have shaped the overall continental distribution of Neanderthal DNA,  
338 locus-specific differences in the occurrence of Neanderthal alleles are also expected to reflect  
339 selective pressures acting on these variants since their introgression in the populations (30, 31).

340 The variation in ancestry composition detected across Italy extends to neighbour regions and  
341 appears to combine historical contributions and ancient stratification. The differences between  
342 Northern and Southern Italian populations are possibly reflecting long-term differential links with  
343 Central and Southern Europe respectively, with additional contributions from the African continent  
344 for the Southern part of Italy and Sardinia.

345 The multifaceted admixture profile here sketched provides an interpretative framework for the  
346 processes that have shaped Southern European genetic variation. The inclusion of ancient samples  
347 spanning diachronic and geographic transects from the Italian peninsula and nearby regions will  
348 help in clearing up further questions about the temporal and spatial dynamics of these processes.

## 349 **Materials and Methods**

350

### 351 *Analysis of modern samples*

352 **Dataset.** Two hundred and twenty-four samples are here present for the first time. Of these, 167  
353 Italians and 6 Albanians were specifically selected and sequenced for this project with two versions

354 (1.2 and 1.3) of the Infinium Omni2.5-8 Illumina beadchip, while 57 additional Italians and  
355 Europeans were previously sequenced with Illumina 660W and are presented here for the first time  
356 (Supplementary materials, table S1). Two separate world-wide datasets were prepared. The Full  
357 Modern Dataset (FMD) included 4,852 samples (1,589 Italians) and 218,725 SNPs genotyped with  
358 Illumina arrays; the High Density Dataset (HDD) contained 1,651 samples (524 Italians) and  
359 591,217 SNPs genotyped with the Illumina Omni array (Supplementary materials).

360 The merging, the removal of ambiguous C/G and A/T and triallelic markers, the exclusion of related  
361 individuals and the discarding of SNPs in linkage disequilibrium (LD) were performed using  
362 PLINK1.9 (43, 44). Only autosomal markers were considered.

363 **Haplotype analysis (CHROMOPAINTER, CP, and fineSTRUCTURE, fs).** Phased haplotypes  
364 were generated using SHAPEIT(45) and applying the HapMap b37 genetic map.

365 CP was employed to generate a matrix of recipient individuals “painted” as a combination of donor  
366 samples (copying vector). Three runs of CP were done for each dataset generating three different  
367 outputs: (i) a matrix of all the individuals “painted” as a combination of all the individuals, for  
368 cluster identification and GT analysis; (ii) a matrix of all Italians as a combination of all Italians,  
369 for  $F_{ST}$  analysis; (iii) a matrix of all the samples as a combination of all the other samples but  
370 excluding Italians, for “local” GT analysis.

371 Clusters were inferred using fineSTRUCTURE (fs). After an initial search based on the “greedy”  
372 mode, the dendrogram was processed by visual inspection (18, 20) according to the geographical  
373 origin of the samples. The robustness of the cluster was obtained by processing the MCMC pairwise  
374 coincidence matrix (Supplementary materials).

375 **Cluster Self-Copy Analysis.** Recently admixed individuals were identified as those copying from  
376 members of the cluster they belong less than the amount of cluster self-copying for samples with  
377 all the four grandparents from the same geographic region (Supplementary materials).



378 **Principal Component Analysis (PCA).** PCA was performed on CP chunkcount matrix  
379 (Supplementary materials) and was generated using the `prcomp()` function on R software (46).  
380 Allele frequencies PCA was performed using `smartpca` implemented in the EIGENSOFT(47) after  
381 pruning the datasets for LD.

382 **Characterization of the migration landscape (EEMS analysis).** Estimated Effective Migration  
383 Surfaces analysis (EEMS) (17) was performed estimating the average pairwise distances between  
384 population using `bed2diffs` tool and the resulting output was visualised by using the `Reems` package  
385 (17).

386 **ADMIXTURE analysis.** ADMIXTURE1.3.0 software (48) was used performing 10 different runs  
387 using a random seed. The results were combined with CLUMPP (49) using the `largeKGreedy`  
388 algorithm and random input orders with 10,000 repeats. *Distruct* implemented in CLUMPAK (50,  
389 51) was then used to identify the best alignment of CLUMPP results. Results were processed using  
390 R statistical software (46) .

391 **F<sub>ST</sub> estimates among clusters.** Pairwise F<sub>ST</sub> estimates among newly generated Italian clusters and  
392 among originally generated European clusters (Supplementary materials) were inferred using  
393 `smartpca` software implemented in the EINGESOFT package (47). Comparisons between the F<sub>ST</sub>  
394 distributions were performed using a Wilcoxon rank sum test in R programming language  
395 environment.

396 **The time and the sources of admixture events (GT analysis and MALDER analysis).** Times of  
397 haplotype-dense data admixture events were investigated using GLOBETROTTERv2 software. GT  
398 was employed using two approaches: complete and non-local (referred as “noItalian”,  
399 Supplementary materials), in default modality (13, 20, 52). The difference between the two  
400 approaches was the inclusion or the exclusion respectively of all the Italian clusters as donors in  
401 the CP matrix used as input file. To improve the precision of the admixture signals, “null.ind 1”  
402 parameter was set (52). Unclear signals were corrected using the default parameters and a total of

403 100 bootstraps were performed. MALDER uses allele frequencies to dissect the time of admixture  
404 signals. The best amplitude was identified and used to calculate a Z-score (Supplementary  
405 materials). A Z-score equal or lower than 2 identifies not significantly different amplitude curves  
406 (53, 54) (Supplementary materials).

407 Sources for both GT and MALDER were grouped in different ancestries as indicated in the legend  
408 of Fig. 3, fig. S16.

409 The expression  $(1950 - (g + 1) * 29)$ , where  $g$  is the number of generation, was used to convert into  
410 years the GT and MALDER results, negative numbers were preceded by BCE (Before Current Era)  
411 letters.

412

### 413 *Analyses including ancient samples*

414 **Dataset.** In order to explore the extent to which the European and Italian genetic variation has been  
415 shaped by ancient demographic events, we merged modern samples from FMD with 63 ancient  
416 samples selected from recent studies (6, 7, 10, 22, 37, 55–57) (data file S1).

417 **Principal Component Analysis (PCA).** We performed two principal components analyses with  
418 the EIGENSOFT (47) smartpca software and the “*lsqproject*” and “*shrinkmode*” option, projecting  
419 the ancient samples on the components inferred from modern European, West Asian and Caucasian  
420 individuals and, then, only on modern European clusters. In order to evaluate the potential impact  
421 of DNA damage in calling variants from aDNA samples, we repeated the PCA with the 63 ancient  
422 samples and modern European, Caucasian and West Asian samples by removing transition  
423 polymorphisms and recorded significant correlations for the localisation of ancient samples along  
424 PC1 and PC2 ( $r > 0.99$ ,  $p\text{-value} < 0.05$ ).

425 **ADMIXTURE analysis.** We projected the ancient samples on the previously inferred ancestral  
426 allele frequencies from 10 ADMIXTURE (48) runs on modern samples (see “Analysis of modern

427 samples” section and Supplementary materials). We used CLUMPP(49) for merging the resulting  
428 matrices and *distruct* (51) for the visualization.

429 **D-STATISTICS.** We tested for admixture using the D-statistics as implemented in the qpDstat tool  
430 in the software ADMIXTOOLS v4.2 (58). We performed the D-statistic analyses evaluating the  
431 relationship of Italian cluster with AN, ABA and SBA. In details, we performed the the D-statistics  
432  $D(\text{Ita1}, \text{Ita2}, \text{AN}/\text{ABA}/\text{SBA}, \text{Mbuti})$  where Ita1 and Ita2 are the different clusters composed mainly  
433 by italian individuals as inferred by fineStructure.

434 **CHROMOPAINTER (CP)/Non-Negative Least Squares (NNLS) analysis.** We used an  
435 approach based on the software CP (12, 59) and a slight adaptation of the non-negative least square  
436 (NNLS) function (13, 18, 19) to estimate the proportions of the genetic contributions from ancient  
437 population to our modern clusters. We run CP using the “unlinked” mode (55) and the same  $N_e$  and  
438  $\theta$  parameters of the modern dataset and we painted both modern and ancient individuals, using only  
439 modern samples as donors (55, 56). Then we “inverted” the output of CP by solving an  
440 appropriately formulated NNLS problem, producing a painting of the modern clusters in terms of  
441 the ancients. We applied this combined approach on different sets of ancient samples (*Ultimate* and  
442 various combinations of *Proximate* sources).

443 The goodness of fit of the NNLS was measured evaluating the residuals of the NNLS analysis. In  
444 details, we focused on the *Proximate* sources, and compared the sum of squared residuals when  
445 ABA or SBA were included/excluded as putative sources.

446 **qpAdm analysis.** We used the ancestral reconstruction method qpAdm, which harnesses different  
447 relationships of populations related to a set of outgroups (eg. f4[Target, O1, O2, O3]).

448 In details, for each tested cluster of the FMD and HDD, we have evaluated all the possible  
449 combinations of N “left” sources with  $N=\{2..5\}$ , and one set of right/left Outgroups (Supplementary  
450 materials).

451 For each of the tested combinations we used qpWave to evaluate if the set of chosen outgroups is  
452 able to I) discriminate the combinations of sources and II) if the target may be explained by the  
453 sources. We used a p-value threshold of 0.01. Finally, we used qpAdm to infer the admixture  
454 proportions and reported it and the associated standard errors in Supplementary table S3 and table  
455 S4. In addition, we performed the same analysis for Iceman, Remedello and Bell Beaker individuals  
456 from Sicily and North Italy (table S5).

457

### 458 *Archaic contribution*

459 **Dataset.** We assembled an additional high density dataset by retaining only samples genotyped on  
460 the Illumina Infinium Omni2.5-8 BeadChip from our larger modern dataset. In particular, we  
461 included seven populations from the 1000 Genomes Project: the five European populations  
462 (Northern European from Utah - CEU, England - GBR, Finland - FIN, Spain - IBS, Italy from  
463 Tuscany - TSI), one from Asia (Han Chinese - CHB) and one from Africa (Yoruba from Nigeria -  
464 YRI). We also retained 466 Italian samples, whose four grandparents were born in the same Italian  
465 region. The Italian samples were broadly clustered according to their geographical origin into  
466 Northern (ITN), Central (ITC), Southern (ITS) Italians and Sardinians (SAR), while TSI samples  
467 from 1000 Genome Project formed a separate cluster (table S10).

468 From this dataset, we extracted 7,164 Neanderthal SNPs tagging Neanderthal introgressed regions  
469 (24). In order to select which allele was inherited from Neanderthals, we chose the one from the  
470 Altai Neanderthal (41) genome when it was homozygous and the minor allele in YRI when it was  
471 heterozygous.

472 **Number of Neanderthal alleles in present-day human populations.** After pruning variants in  
473 linkage disequilibrium, we counted the number of Neanderthal alleles considering all the tag-SNP  
474 across all samples. Then, we compared the distribution of Neanderthal allele counts across

475 populations with the two-sample Wilcoxon rank sum test. We repeated the same analyses after  
476 removing outlier individuals.

477 **Basal Eurasian ancestry and Neanderthal contribution.** In order to infer the proportion of Basal  
478 Eurasian present in European populations (6, 7), we used the  $f_4$  ratio implemented in the  
479 ADMIXTOOLS package (58) in the form  $f_4(\text{Target}, \text{Loschbour}, \text{Ust\_Ishim}, \text{Kostenki14})/$   
480  $f_4(\text{Mbuti}, \text{Loschbour}, \text{Ust\_Ishim}, \text{Kostenki14})$ . We repeated this approach to infer the Neanderthal  
481 ancestry, in the form  $f_4(\text{Mbuti}, \text{Chimp Target}, \text{Altai})/ f_4(\text{Mbuti}, \text{Chimp}, \text{Dinka}, \text{Altai})$  (fig. S18,  
482 fig. S19). We then performed the same analyses by grouping the modern individuals according to  
483 the CP/fS inferred clusters (“Analysis of modern samples” section) and retained only clusters with  
484 at least 10 samples (Fig. 4)

485 **African ancestry and Neanderthal legacy.** The impact of African contributions in shaping the  
486 amount of Neanderthal occurrence was evaluated by exploring how the removal of the clusters  
487 showing African gene-flow as detected by GT analysis (Fig. 3) and how individuals belonging to  
488 these clusters affected the correlation between Basal Eurasian/Neanderthal estimates and the degree  
489 of population differentiation in the amount of Neanderthal alleles, respectively (Supplementary  
490 materials; fig. S17).

491 **Comparison of Neanderthal allele frequencies across modern populations.** We computed the  
492 allele frequency differences for every SNPs for each of the possible pairs of the eleven populations  
493 in our dataset, thus obtaining 55 distributions (Supplementary materials). Then, we selected the  
494 NTT SNPs, i.e. the Neanderthal-Tag SNPs in the Top 1% of each distribution (data file S4).

495 **The biological implications of Neanderthal introgression.** Given the list of genes overlapping  
496 the Neanderthal introgressed regions harbouring the NTT SNPs and the list of genes directly  
497 harbouring the NTT SNPs, we performed different enrichment tests with the online tool EnrichR  
498 (60, 61). Particularly, we searched for significant enrichments compared to the human genome  
499 using the EnrichR collection of database, e.g. dbGaP (62, 63), Panther 2016 (64), HPO (65) and

500 KEGG 2016 (66–68) (data file S4). We then investigated known direct associations between the  
501 Neanderthal alleles of the NTT SNPs and phenotypes, by looking in the GWAS and PheWAS  
502 catalogues (32, 33) and by applying the PheGenI tool (69) (Supplementary Data 5). We used the  
503 circos representation as in Kanai et al. (70), to highlight different sets of NTT SNPs (Figure 4F).

## 504 **References**

- 505 1. I. Lazaridis *et al.*, Ancient human genomes suggest three ancestral populations for present-day  
506 Europeans. *Nature*. **513**, 409–413 (2014).
- 507 2. T. Günther *et al.*, Ancient genomes link early farmers from Atapuerca in Spain to modern-day  
508 Basques. *Proc. Natl. Acad. Sci. U. S. A.* **112**, 11917–11922 (2015).
- 509 3. W. Haak *et al.*, Massive migration from the steppe was a source for Indo-European languages in  
510 Europe. *Nature*. **522**, 207–211 (2015).
- 511 4. C. W. K. Chiang *et al.*, Genomic history of the Sardinian population. *Nat. Genet.* **50**, 1426–1434  
512 (2018).
- 513 5. M. E. Allentoft *et al.*, Population genomics of Bronze Age Eurasia. *Nature*. **522**, 167–172 (2015).
- 514 6. I. Lazaridis *et al.*, Genomic insights into the origin of farming in the ancient Near East. *Nature*. **536**,  
515 419–424 (2016).
- 516 7. Q. Fu *et al.*, The genetic history of Ice Age Europe. *Nature*. **534**, 200–205 (2016).
- 517 8. E. R. Jones *et al.*, Upper Palaeolithic genomes reveal deep roots of modern Eurasians. *Nat. Commun.*  
518 **6**, 8912 (2015).
- 519 9. D. W. Anthony, *The Horse, the Wheel, and Language: How Bronze-Age Riders from the Eurasian*  
520 *Steppes Shaped the Modern World* (Princeton University Press, 2010).
- 521 10. I. Lazaridis *et al.*, Genetic origins of the Minoans and Mycenaeans. *Nature*. **548**, 214–218 (2017).
- 522 11. P. Paschou *et al.*, Maritime route of colonization of Europe. *Proc. Natl. Acad. Sci. U. S. A.* **111**, 9211–  
523 9216 (2014).
- 524 12. D. J. Lawson, G. Hellenthal, S. Myers, D. Falush, Inference of population structure using dense  
525 haplotype data. *PLoS Genet.* **8**, e1002453 (2012).
- 526 13. S. Leslie *et al.*, The fine-scale genetic structure of the British population. *Nature*. **519**, 309–314  
527 (2015).
- 528 14. G. Athanasiadis *et al.*, Nationwide Genomic Study in Denmark Reveals Remarkable Population  
529 Homogeneity. *Genetics*. **204**, 711–722 (2016).
- 530 15. R. P. Byrne *et al.*, Insular Celtic population structure and genomic footprints of migration. *PLoS*  
531 *Genet.* **14**, e1007152 (2018).
- 532 16. C. Bycroft *et al.*, Patterns of genetic differentiation and the footprints of historical migrations in the  
533 Iberian Peninsula (2018), , doi:10.1101/250191.
- 534 17. D. Petkova, J. Novembre, M. Stephens, Visualizing spatial population structure with estimated

- 535 effective migration surfaces. *Nat. Genet.* **48**, 94–100 (2016).
- 536 18. F. Montinaro *et al.*, Unravelling the hidden ancestry of American admixed populations. *Nat.*  
537 *Commun.* **6**, 6596 (2015).
- 538 19. C. L. Lawson, R. J. Hanson, *Solving Least Squares Problems* (SIAM, 1995).
- 539 20. G. B. J. Busby *et al.*, The Role of Recent Admixture in Forming the Contemporary West Eurasian  
540 Genomic Landscape. *Curr. Biol.* **25**, 2518–2526 (2015).
- 541 21. G. Hellenthal *et al.*, A genetic atlas of human admixture history. *Science.* **343**, 747–751 (2014).
- 542 22. I. Olalde *et al.*, The Beaker phenomenon and the genomic transformation of northwest Europe.  
543 *Nature.* **555**, 190–196 (2018).
- 544 23. B. Vernot, J. M. Akey, Resurrecting surviving Neandertal lineages from modern human genomes.  
545 *Science.* **343**, 1017–1021 (2014).
- 546 24. C. N. Simonti *et al.*, The phenotypic legacy of admixture between modern humans and Neandertals.  
547 *Science.* **351**, 737–741 (2016).
- 548 25. K. Prüfer *et al.*, A high-coverage Neandertal genome from Vindija Cave in Croatia. *Science.* **358**,  
549 655–658 (2017).
- 550 26. F. Arcuri *et al.*, . (2016). Influssi balcanici e genesi del Bronzo antico in Italia meridionale: la koinè  
551 Cetina e la facies di Palma Campania. *Riv. di Sci. Preist.* **LXVI**, 77–95 (2016).
- 552 27. R. E. Green *et al.*, A draft sequence of the Neandertal genome. *Science.* **328**, 710–722 (2010).
- 553 28. B. Vernot *et al.*, Excavating Neandertal and Denisovan DNA from the genomes of Melanesian  
554 individuals. *Science.* **352**, 235–239 (2016).
- 555 29. S. Castellano *et al.*, Patterns of coding variation in the complete exomes of three Neandertals. *Proc.*  
556 *Natl. Acad. Sci. U. S. A.* **111**, 6666–6671 (2014).
- 557 30. K. Harris, R. Nielsen, The Genetic Cost of Neanderthal Introgression. *Genetics.* **203**, 881–891 (2016).
- 558 31. I. Juric, S. Aeschbacher, G. Coop, The Strength of Selection against Neanderthal Introgression. *PLoS*  
559 *Genet.* **12**, e1006340 (2016).
- 560 32. J. C. Denny *et al.*, Systematic comparison of phenome-wide association study of electronic medical  
561 record data and genome-wide association study data. *Nat. Biotechnol.* **31**, 1102–1110 (2013).
- 562 33. J. MacArthur *et al.*, The new NHGRI-EBI Catalog of published genome-wide association studies  
563 (GWAS Catalog). *Nucleic Acids Res.* **45**, D896–D901 (2017).
- 564 34. M. Dannemann, K. Prüfer, J. Kelso, Functional implications of Neandertal introgression in modern  
565 humans. *Genome Biol.* **18**, 61 (2017).
- 566 35. C. Bornstein *et al.*, SPATA18, a spermatogenesis-associated gene, is a novel transcriptional target of  
567 p53 and p63. *Mol. Cell. Biol.* **31**, 1679–1689 (2011).
- 568 36. R. M. Gittelman *et al.*, Archaic Hominin Admixture Facilitated Adaptation to Out-of-Africa  
569 Environments. *Curr. Biol.* **26**, 3375–3382 (2016).
- 570 37. I. Mathieson *et al.*, The genomic history of southeastern Europe. *Nature.* **555**, 197–203 (2018).
- 571 38. C. Capelli *et al.*, Moors and Saracens in Europe: estimating the medieval North African male legacy

- 572 in southern Europe. *Eur. J. Hum. Genet.* **17**, 848–852 (2009).
- 573 39. M. Sazzini *et al.*, Complex interplay between neutral and adaptive evolution shaped differential  
574 genomic background and disease susceptibility along the Italian peninsula. *Sci. Rep.* **6**, 32513 (2016).
- 575 40. S. Sarno *et al.*, Ancient and recent admixture layers in Sicily and Southern Italy trace multiple  
576 migration routes along the Mediterranean. *Sci. Rep.* **7**, 1984 (2017).
- 577 41. K. Prüfer *et al.*, The complete genome sequence of a Neanderthal from the Altai Mountains. *Nature.*  
578 **505**, 43–49 (2014).
- 579 42. A. B. Wolf, J. M. Akey, Outstanding questions in the study of archaic hominin admixture. *PLoS*  
580 *Genet.* **14**, e1007349 (2018).
- 581 43. S. Purcell *et al.*, PLINK: a tool set for whole-genome association and population-based linkage  
582 analyses. *Am. J. Hum. Genet.* **81**, 559–575 (2007).
- 583 44. C. C. Chang *et al.*, Second-generation PLINK: rising to the challenge of larger and richer datasets.  
584 *Gigascience.* **4** (2015), doi:10.1186/s13742-015-0047-8.
- 585 45. O. Delaneau, J.-F. Zagury, J. Marchini, Improved whole-chromosome phasing for disease and  
586 population genetic studies. *Nat. Methods.* **10**, 5–6 (2013).
- 587 46. Team, R Core, R: A language and environment for statistical computing. R Foundation for Statistical  
588 Computing, Vienna, Austria. 2016 (2017).
- 589 47. N. Patterson, A. L. Price, D. Reich, Population structure and eigenanalysis. *PLoS Genet.* **2**, e190  
590 (2006).
- 591 48. D. H. Alexander, J. Novembre, K. Lange, Fast model-based estimation of ancestry in unrelated  
592 individuals. *Genome Res.* **19**, 1655–1664 (2009).
- 593 49. M. Jakobsson, N. A. Rosenberg, CLUMPP: a cluster matching and permutation program for dealing  
594 with label switching and multimodality in analysis of population structure. *Bioinformatics.* **23**, 1801–  
595 1806 (2007).
- 596 50. N. M. Kopelman, J. Mayzel, M. Jakobsson, N. A. Rosenberg, I. Mayrose, Clumpak: a program for  
597 identifying clustering modes and packaging population structure inferences across K. *Mol. Ecol.*  
598 *Resour.* **15**, 1179–1191 (2015).
- 599 51. N. A. Rosenberg, distruct: a program for the graphical display of population structure. *Mol. Ecol.*  
600 *Notes.* **4**, 137–138 (2004).
- 601 52. G. Hudjashov *et al.*, Complex Patterns of Admixture across the Indonesian Archipelago. *Mol. Biol.*  
602 *Evol.* **34**, 2439–2452 (2017).
- 603 53. F. Montinaro *et al.*, Complex Ancient Genetic Structure and Cultural Transitions in Southern African  
604 Populations. *Genetics.* **205**, 303–316 (2017).
- 605 54. G. B. Busby *et al.*, Admixture into and within sub-Saharan Africa. *Elife.* **5** (2016),  
606 doi:10.7554/eLife.15266.
- 607 55. Z. Hofmanová *et al.*, Early farmers from across Europe directly descended from Neolithic Aegeans.  
608 *Proc. Natl. Acad. Sci. U. S. A.* **113**, 6886–6891 (2016).
- 609 56. F. Broushaki *et al.*, Early Neolithic genomes from the eastern Fertile Crescent. *Science.* **353**, 499–503  
610 (2016).



- 611 57. I. Mathieson *et al.*, Genome-wide patterns of selection in 230 ancient Eurasians. *Nature*. **528**, 499–  
612 503 (2015).
- 613 58. N. Patterson *et al.*, Ancient admixture in human history. *Genetics*. **192**, 1065–1093 (2012).
- 614 59. N. Li, M. Stephens, Modeling linkage disequilibrium and identifying recombination hotspots using  
615 single-nucleotide polymorphism data. *Genetics*. **165**, 2213–2233 (2003).
- 616 60. E. Y. Chen *et al.*, Enrichr: interactive and collaborative HTML5 gene list enrichment analysis tool.  
617 *BMC Bioinformatics*. **14**, 128 (2013).
- 618 61. M. V. Kuleshov *et al.*, Enrichr: a comprehensive gene set enrichment analysis web server 2016  
619 update. *Nucleic Acids Res.* **44**, W90–7 (2016).
- 620 62. M. D. Mailman *et al.*, The NCBI dbGaP database of genotypes and phenotypes. *Nat. Genet.* **39**,  
621 1181–1186 (2007).
- 622 63. K. A. Tryka *et al.*, NCBI's Database of Genotypes and Phenotypes: dbGaP. *Nucleic Acids Res.* **42**,  
623 D975–D979 (2013).
- 624 64. H. Mi *et al.*, PANTHER version 11: expanded annotation data from Gene Ontology and Reactome  
625 pathways, and data analysis tool enhancements. *Nucleic Acids Res.* **45**, D183–D189 (2017).
- 626 65. S. Köhler *et al.*, The Human Phenotype Ontology in 2017. *Nucleic Acids Res.* **45**, D865–D876 (2017).
- 627 66. M. Kanehisa, Y. Sato, M. Kawashima, M. Furumichi, M. Tanabe, KEGG as a reference resource for  
628 gene and protein annotation. *Nucleic Acids Res.* **44**, D457–62 (2016).
- 629 67. M. Kanehisa, M. Furumichi, M. Tanabe, Y. Sato, K. Morishima, KEGG: new perspectives on  
630 genomes, pathways, diseases and drugs. *Nucleic Acids Res.* **45**, D353–D361 (2016).
- 631 68. M. Kanehisa, KEGG: Kyoto Encyclopedia of Genes and Genomes. *Nucleic Acids Res.* **28**, 27–30  
632 (2000).
- 633 69. E. M. Ramos *et al.*, Phenotype–Genotype Integrator (PheGenI): synthesizing genome-wide  
634 association study (GWAS) data with existing genomic resources. *Eur. J. Hum. Genet.* **22**, 144–147  
635 (2013).
- 636 70. M. Kanai *et al.*, Genetic analysis of quantitative traits in the Japanese population links cell types to  
637 complex human diseases. *Nat. Genet.* **50**, 390–400 (2018).
- 638 71. 1000 Genomes Project Consortium *et al.*, A global reference for human genetic variation. *Nature*.  
639 **526**, 68–74 (2015).
- 640 72. J. Z. Li *et al.*, Worldwide human relationships inferred from genome-wide patterns of variation.  
641 *Science*. **319**, 1100–1104 (2008).
- 642 73. S. Parolo *et al.*, Characterization of the biological processes shaping the genetic structure of the  
643 Italian population. *BMC Genet.* **16**, 132 (2015).
- 644 74. A. R. Martin *et al.*, Haplotype sharing provides insights into fine-scale population history and disease  
645 in Finland (2017), , doi:10.1101/200113.
- 646 75. P. Skoglund *et al.*, Origins and genetic legacy of Neolithic farmers and hunter-gatherers in Europe.  
647 *Science*. **336**, 466–469 (2012).
- 648 76. J. K. Pickrell *et al.*, Ancient west Eurasian ancestry in southern and eastern Africa. *Proc. Natl. Acad.*

- 649 *Sci. U. S. A.* **111**, 2632–2637 (2014).
- 650 77. T. Günther, M. Jakobsson, Genes mirror migrations and cultures in prehistoric Europe—a population  
651 genomic perspective. *Curr. Opin. Genet. Dev.* **41**, 115–123 (2016).
- 652 78. R. Nielsen *et al.*, Tracing the peopling of the world through genomics. *Nature.* **541**, 302–310 (2017).
- 653 79. G. M. Kılınç *et al.*, The Demographic Development of the First Farmers in Anatolia. *Curr. Biol.* **26**,  
654 2659–2666 (2016).
- 655 80. M. Lipson *et al.*, Parallel palaeogenomic transects reveal complex genetic history of early European  
656 farmers. *Nature.* **551**, 368–372 (2017).
- 657 81. L. Abi-Rached *et al.*, The shaping of modern human immune systems by multiregional admixture  
658 with archaic humans. *Science.* **334**, 89–94 (2011).
- 659 82. S. Sankararaman, N. Patterson, H. Li, S. Pääbo, D. Reich, The date of interbreeding between  
660 Neandertals and modern humans. *PLoS Genet.* **8**, e1002947 (2012).
- 661 83. L. C. Jacobs *et al.*, Comprehensive candidate gene study highlights UGT1A and BNC2 as new genes  
662 determining continuous skin color variation in Europeans. *Hum. Genet.* **132**, 147–158 (2013).
- 663 84. S. Sankararaman *et al.*, The genomic landscape of Neanderthal ancestry in present-day humans.  
664 *Nature.* **507**, 354–357 (2014).
- 665 85. H. C. Stanescu *et al.*, Risk HLA-DQA1 and PLA(2)R1 alleles in idiopathic membranous  
666 nephropathy. *N. Engl. J. Med.* **364**, 616–626 (2011).
- 667 86. P. Sekula *et al.*, Genetic risk variants for membranous nephropathy: extension of and association with  
668 other chronic kidney disease aetiologies. *Nephrol. Dial. Transplant.* **32**, 325–332 (2017).
- 669 87. C. A. McCarty *et al.*, The eMERGE Network: A consortium of biorepositories linked to electronic  
670 medical records data for conducting genomic studies. *BMC Med. Genomics.* **4** (2011),  
671 doi:10.1186/1755-8794-4-13.

672  
673 **Acknowledgments**

674  
675 **General:** We would like to thank St Hugh’s College and the Department of Zoology for facilitating  
676 the visits of A.R. and S.A. to the University of Oxford and the PhD programs of the University of  
677 Pavia and University of Turin for supporting these visits; the High Performance Computing Facility  
678 of the Oxford University and CINECA for the computational resources, the programming  
679 assistance and advices given during this project; the SU.VI.MAX for the access to the  $F_{ST}$  estimates  
680 of their unpublished work (C.D., J.G., P.G.); Tony Capra for sharing the list of Neanderthal  
681 introgressed regions in humans; Ryan Daniels and Miguel Gonzales Santos for the computing  
682 advices during the early stages of this project; Luca Alessandri for his comments on the  
683 archaeological context of the Bronze Age in Italy and surrounding regions; Simonetta Guarrera for

684 technical support (C.D.G., G.M.); the National Alpini Association (Associazione Nazionale Alpini)  
685 for their help in collecting Italian DNA samples at the 86<sup>th</sup> national assembly in Piacenza in 2013,  
686 in particular Bruno Plucani, Giangaspere Basile, Claudio Ferrari and the municipality of Piacenza  
687 (A.O., A.A.). Finally, the authors would like to acknowledge all the people that donated their DNA  
688 and made this work possible.

689 **Funding:** The Leverhulme Trust (F.M., C.C.); the Italian Ministry of Education, University and  
690 Research (MIUR): “Progetti Futuro in Ricerca 2012” (RBFR126B8I) (A.O., A.A.); the  
691 “Dipartimenti di Eccellenza (2018–2022)” (Dept. of Medical Sciences of Turin; G.M.; Dept. of  
692 Biology and Biotechnology of Pavia; A.A., A.O., O.S., A.T.); the Italian Institute for genomic  
693 Medicine (IIGM) and Compagnia di San Paolo Torino, Italy (G.M.); the European Community,  
694 Sixth Framework Program (PROCARDIS: LSHM-CT-2007-037273) (S.B.); the Italian Ministry of  
695 Health (Besta CEDIR project: RC 2007/LR6, RC 2008/LR6; RC 2009/LR8; RC 2010/LR8; GR-  
696 2011-02347041) (G.B.B.); “Progetti di Ricerca finanziati dall’Università degli Studi di Torino (ex  
697 60%) (2015)” (C.D.G., G.M.); ANR-14-CE10-0001 and Région Pays de la Loire (J.G.).

698 **Author Contributions:** A.O., A.A., G.M., F.M., and C.C. conceived the idea for the study; A.R.,  
699 S.A., F.M. and C.C. performed, devised or supervised the analyses; A.A., A.O., F.B. and V.L.P.  
700 provided reagents for the genotyping of novel samples; all the authors contributed to this study  
701 providing data, computational facilities, or other resources; A.R., S.A., F.M. and C.C. wrote the  
702 manuscript with inputs from co-authors.

703 **Competing interests:** The authors declare no competing interests.

704 **Data and materials availability:** Requests for accessing previously published data should be  
705 directed to the corresponding author of the publications where they were originally presented.  
706 Enquiries for unpublished data should be directed to Mait Metspalu (Genotype data provided by  
707 the Estonian Biocentre), Simon Myers ( $F_{ST}$  estimates among clusters in Spain), Christian Dina ( $F_{ST}$   
708 estimates among clusters in France). Data genotyped as part of this project and presented here for

709 the first time (135 Italian samples and 6 samples from Albania, genotyped on the Infinium Omni2.5-  
710 8 Illumina beadchip) can be downloaded at the following webpage: XXX

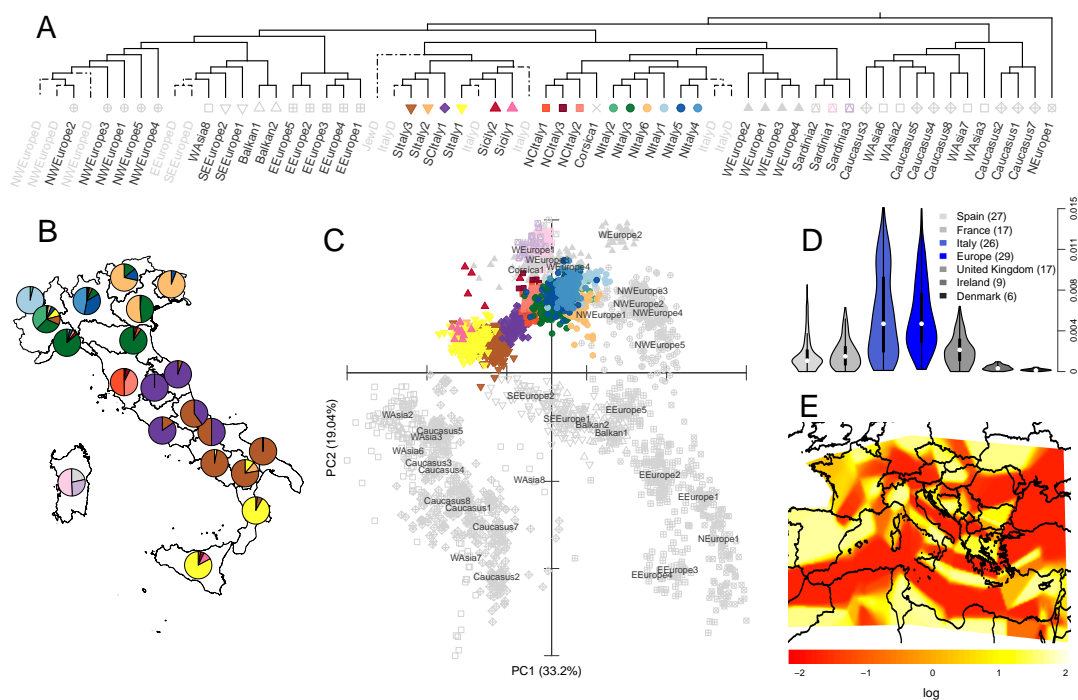

**Fig. 1. Genetic structure of the Italian populations.**

A) Simplified dendrogram of 3,057 Eurasian samples clustered by the fS algorithm using the CP output (complete dendrogram in fig. S2A); each leaf represents a cluster of individuals with similar copying vectors; clusters with more than five individuals are labelled in black; Italian clusters are colour coded; grey labels ending with the D letter refer to clusters containing less than five individuals or individuals of uncertain origin that have been removed in the following analyses. B) Pie charts summarizing the relative proportions of inferred fS genetic clusters for all the 20 Italian administrative regions (colours as in A). C) PCA based on CP chunkcount matrix (colours as in A); the centroid of the individuals belonging to non-Italian clusters is identified by the label for each cluster. D) Between-clusters  $F_{st}$  estimates within European groups; clusters were generated using only individuals belonging to the population analysed (Materials and Methods, Supplementary materials); the number of genetic clusters analysed for each population is reported within brackets; for the comparisons across Europe, the cluster NEurope1 containing almost exclusively Finnish individuals was excluded ( $F_{st}$  estimates for Italian and European clusters are in data file S3);  $F_{st}$  distributions statistically different from the Italian set are in grey. E) Estimated Effective Migration Surfaces (EEMS) analysis in Southern Europe; colours represent the log10 scale of the effective migration rate, from low (red) to high (yellow).

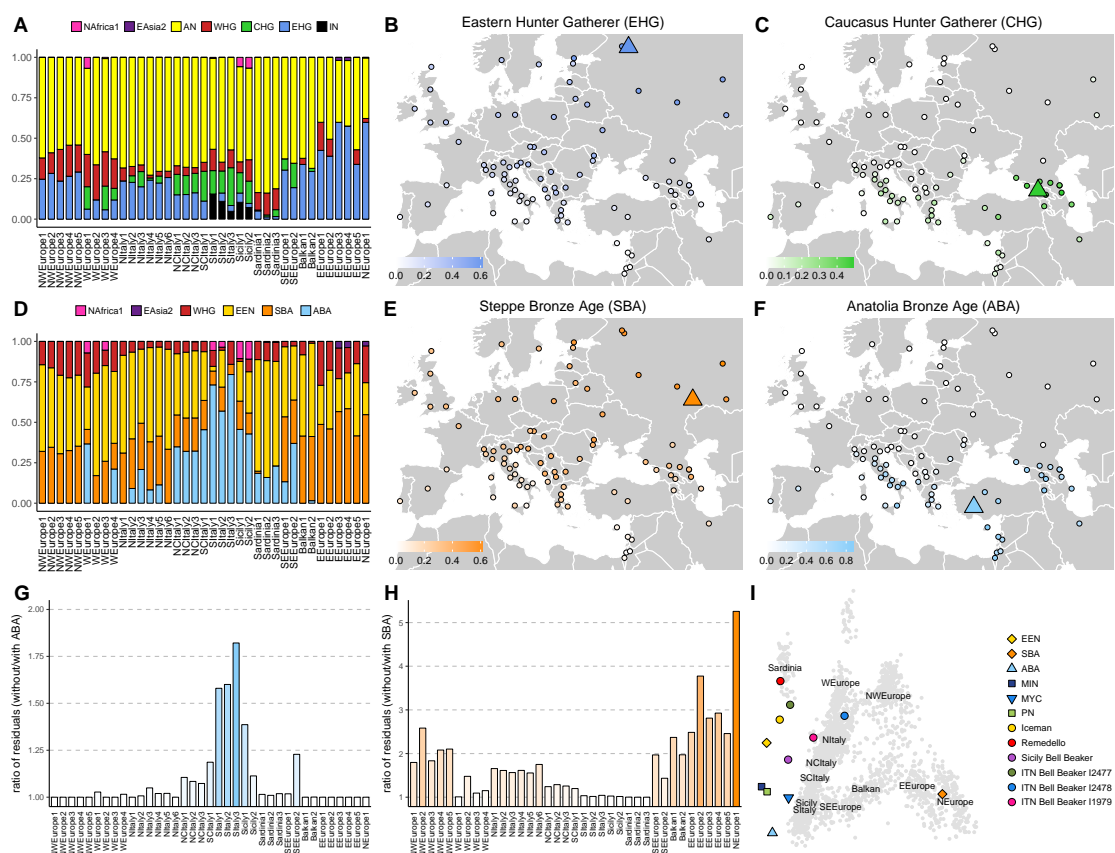

**Fig. 2. Ancient ancestries in Western Eurasian modern-day clusters and Italian ancient samples.**

A, D) CP/NNLS analysis on all Italian and European clusters using as donors different sets of ancient samples and two modern clusters (NAfrica1: North Africa, EAsia2: East Asia) (full results in fig. S8). A) *Ultimate* sources: AN, Anatolian Neolithic (Bar8); WHG, Western Hunter Gatherer (Bichon); CHG, Caucasus Hunter Gatherer (KK1); EHG, Eastern Hunter Gatherer (I0061); IN, Iranian Neolithic (WC1). B) EHG and C) CHG ancestry contributions in Western Eurasia, as inferred in A and fig. S8A (Supplementary materials). D) Same as in A, using *Proximate* sources: WHG, Western Hunter Gatherer (Bichon); EEN, European Early Neolithic (Stuttgart); SBA, Bronze Age from Steppe (I0231); ABA, Bronze Age from Anatolia (I2683). E) SBA and F) ABA ancestry contributions, as inferred in D and fig. S8B. Triangles refer to the location of ancient samples used as sources (see data file S1). G): ratio of the residuals in the NNLS analysis (Materials and Methods, Supplementary materials) for all the Italian and European clusters when ABA was excluded and included in the set of *Proximate* sources; H) as in G), but excluding/including SBA instead of ABA; J) Ancient Italian and other selected ancient samples projected on the components inferred from modern European individuals. Labels are placed at the centroid of the individuals belonging to the indicated clusters.

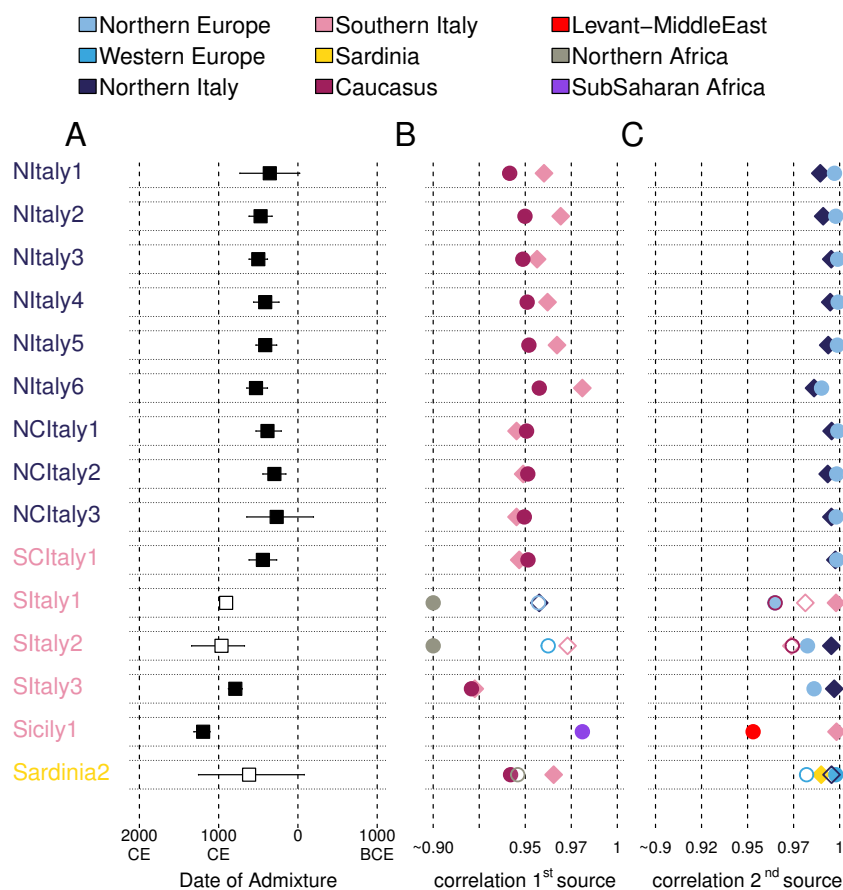

**Fig. 3. Admixture events inferred by GLOBETROTTER (GT).**

A) Dates of the events inferred in the GT “noItaly” analysis on all the Italian clusters (els as in Fig. 1A and data file S2; full results in fig. S16 and table S7; see Materials and Methods, Supplementary materials); lines encompassed the 95% CI. GT events were distinguished in “one date” (black squares; 1D in table S7) and “one date multiway” (white squares; 1MW). B) Correlation values between copying vectors of 1<sup>st</sup> source(s) identified by GT and the best proxy in the noItaly analysis (circles) or the best proxy among Italian clusters (diamonds). C) Same as in B, referring to 2<sup>nd</sup> source(s) copying vectors. Empty symbols refer to additional 1<sup>st</sup> (B) and 2<sup>nd</sup> (C) sources detected in multiway events. African best proxies in (B) for clusters SItaly1 and SItaly2 were plotted on the 0.90 boundary for visualisation only, the correlation values being 0.78 and 0.87 respectively. Colours of symbols refer to the ancestry to which proxies were assigned (see Materials and Methods, Supplementary materials).

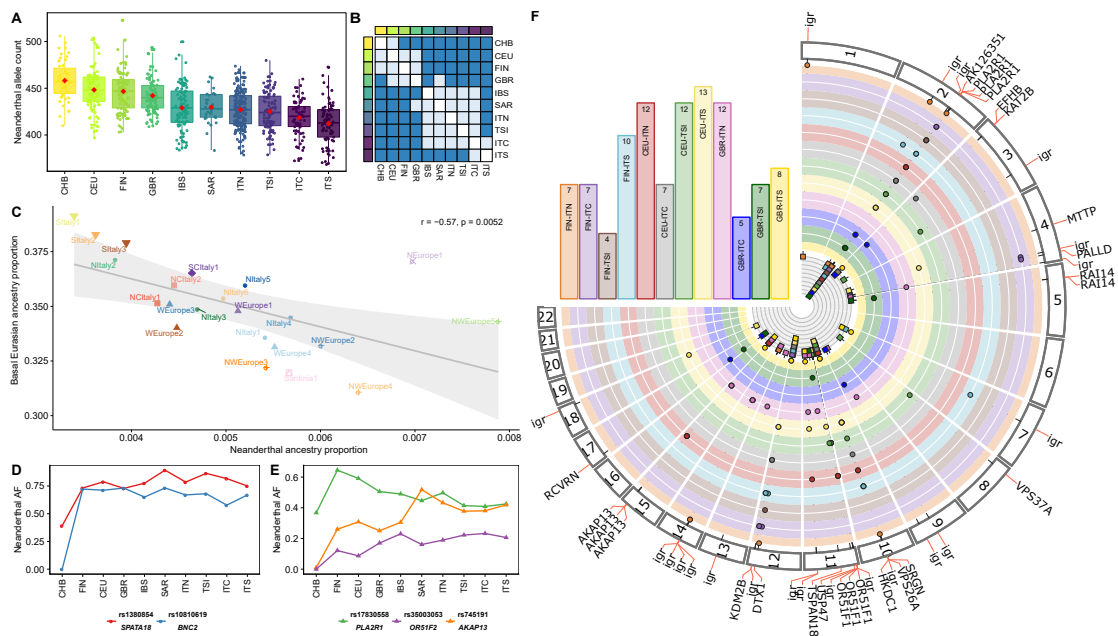

**Fig. 4. Neanderthal ancestry distribution in Eurasian populations.**

A) Neanderthal allele counts in individuals from Eurasian populations, sorted by median values on 3,969 LD-pruned Neanderthal tag-SNPs. CEU, Utah Residents with Northern and Western European ancestry; GBR, British in England and Scotland; FIN, Finnish in Finland; IBS, Iberian Population in Spain; TSI, Tuscans from Italy; ITN, Italians from North Italy; ITC, Italians from Central Italy; ITS, Italians from South Italy; SAR, Italians from Sardinia; CHB, Han Chinese. B) Matrix of significances based on Wilcoxon rank sum test between pairs of populations including (lower triangular matrix) and removing (upper) outliers (Materials and Methods, Supplementary materials; dark blue: adj p-value < 0.05; light blue: adj p-value > 0.05). C) Correlation between Neanderthal ancestry proportions and the amount of Basal Eurasian ancestry in European clusters (Materials and Methods, Supplementary materials). D, E) Neanderthal allele frequency (AF) for selected SNPs within the indicated genes: D) high frequency alleles in Europe; E) North-South Europe divergent alleles. F) Comparisons between Northern European and Italian populations (excluding Sardinia). Bars refer to comparison for reported pairs of populations; the number of NTT SNPs is reported within bars. Each section of the circo represents a tested chromosome; points refer to NTT SNPs. Colours, same as for bars; igr: intergenic region variant.



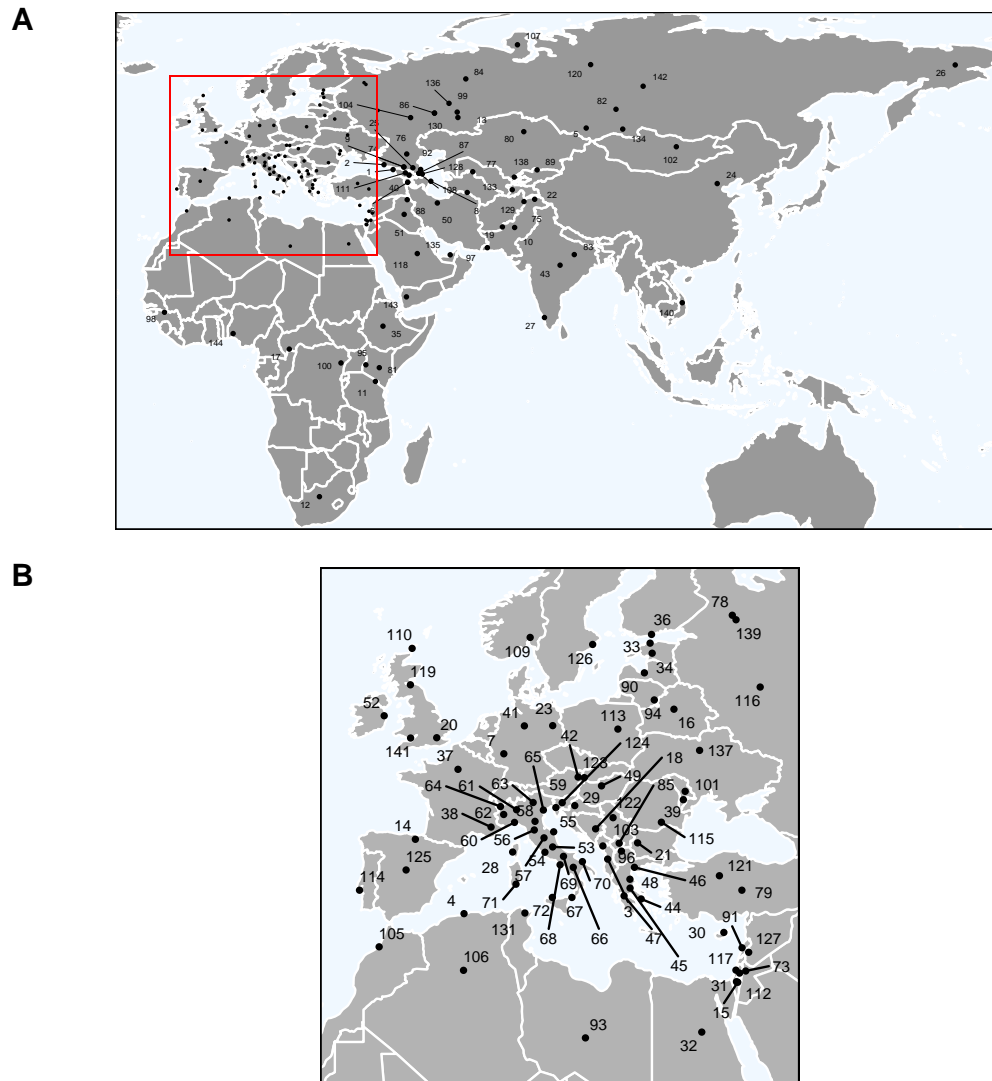

**Fig. S1. Geographic location of populations included in FMD and HDD.**

A) European, North African and Western Eurasia samples; B) World-wide samples. Numbers as in table S1.

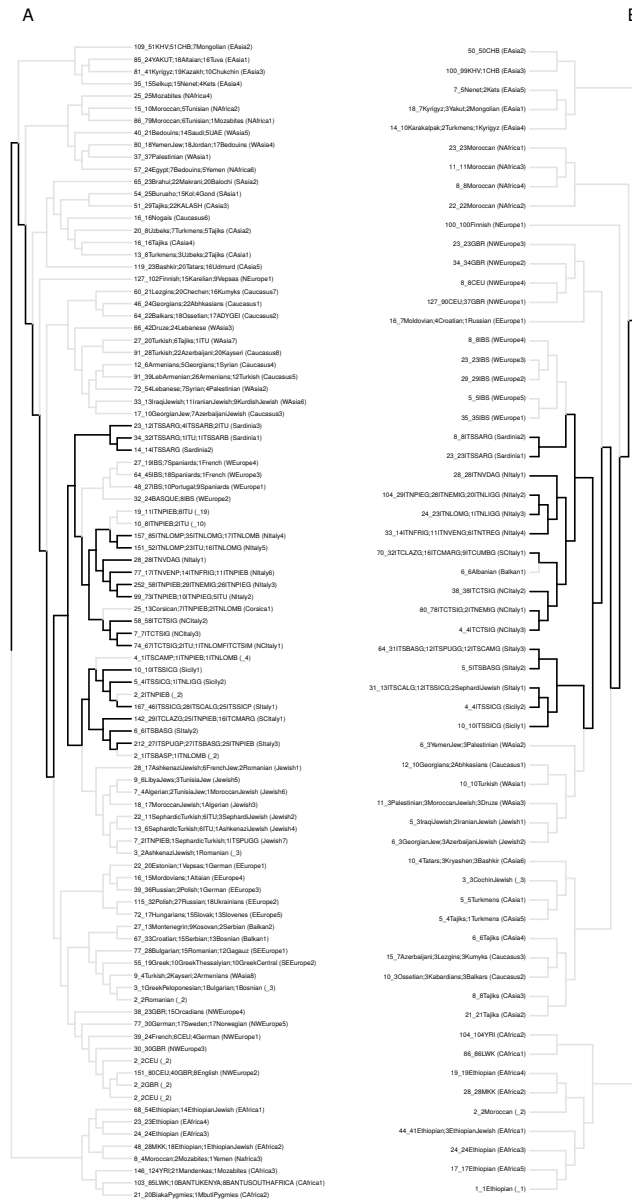

**Fig. S2. fineSTRUCTURE dendrogram of all the 4,852 (A, FMD) and 1,641 (B, HDD) samples.** Each tip of the dendrograms represents a group of individuals with similar copying vectors. The first number of each tip label refers to the total number of individuals in the cluster. This value is followed by “\_” and the name of the three most representative geographically-assigned populations, each with its number of samples. At the end, within brackets, the name given to the cluster. Thick lines in black refer to the Italian clusters. The details of cluster assignation are reported in data file S2.

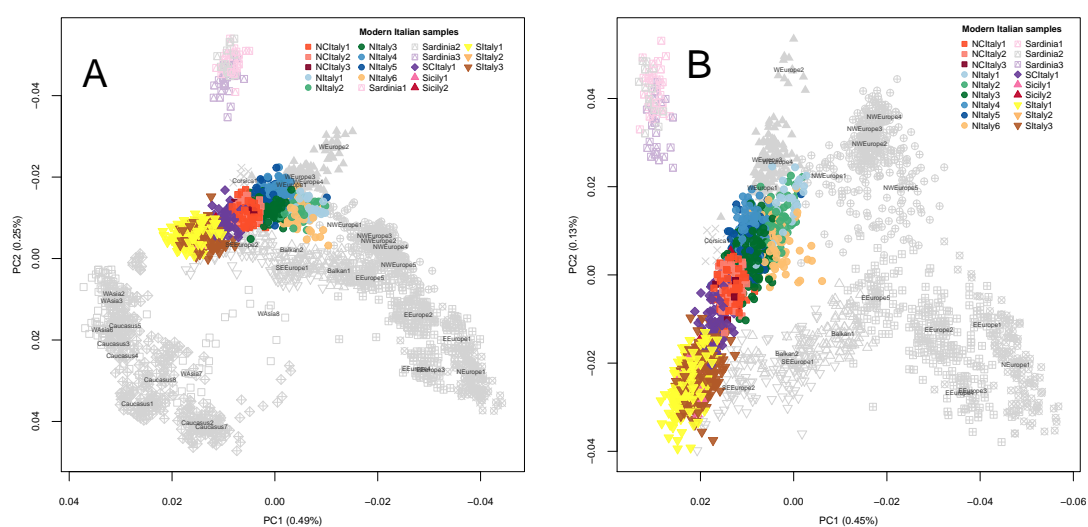

**Fig. S3. Allele frequency Principal Components Analysis (PCA) of modern samples (genotype-based).**

A) PCA of 3,057 modern samples included in Eurasian CP/fs inferred clusters; all the samples are labelled and coloured as in Fig. 1A. B) PCA of 2,469 modern European samples as displayed from the dendrogram resulting from CP/fs (Fig. 1A).

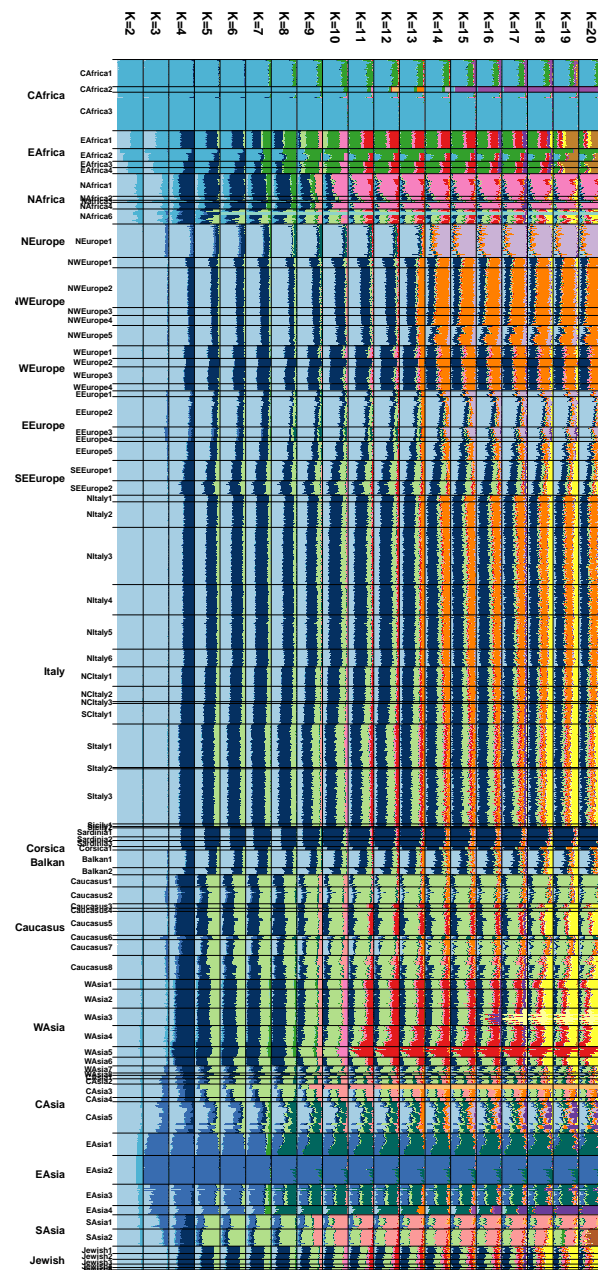

**Fig. S4. Individual-level ADMIXTURE analysis of modern samples.**

Samples are grouped according to the genetic clusters inferred by the CP/fS pipeline and named as in fig. S2.

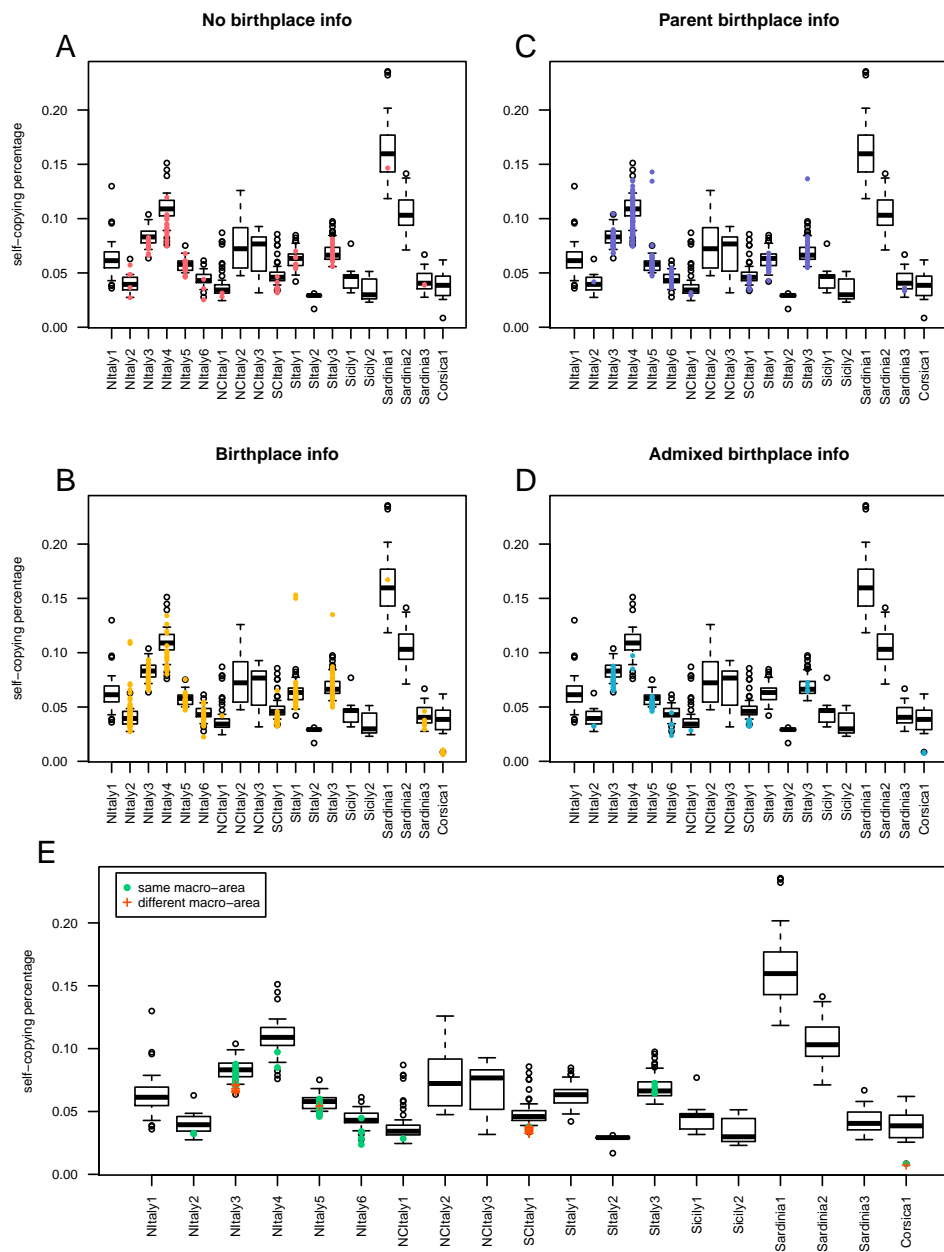

**Fig. S5. “Cluster self-copy” analysis.**

Box plots refer to the distributions of the self-copying vectors for each cluster for samples with same birthplace region for the four grandparents; coloured points refer to individual samples with other/no information; outliers are indicated as white circles. Coloured points refer to: A) subjects with no information available on their place of birth (red); B) subjects with only their own birthplace information (yellow); C) subjects with parents birthplace information (violet); D) subjects with “mixed” parental ancestry (parents from different regions) (blue); E) same as in D), red crosses identify individuals with parents born in different macro-areas (North and South Italy) indicated as suffix in each Italian population (table S1), while green dots refer to samples with parents born in the same macro-area.

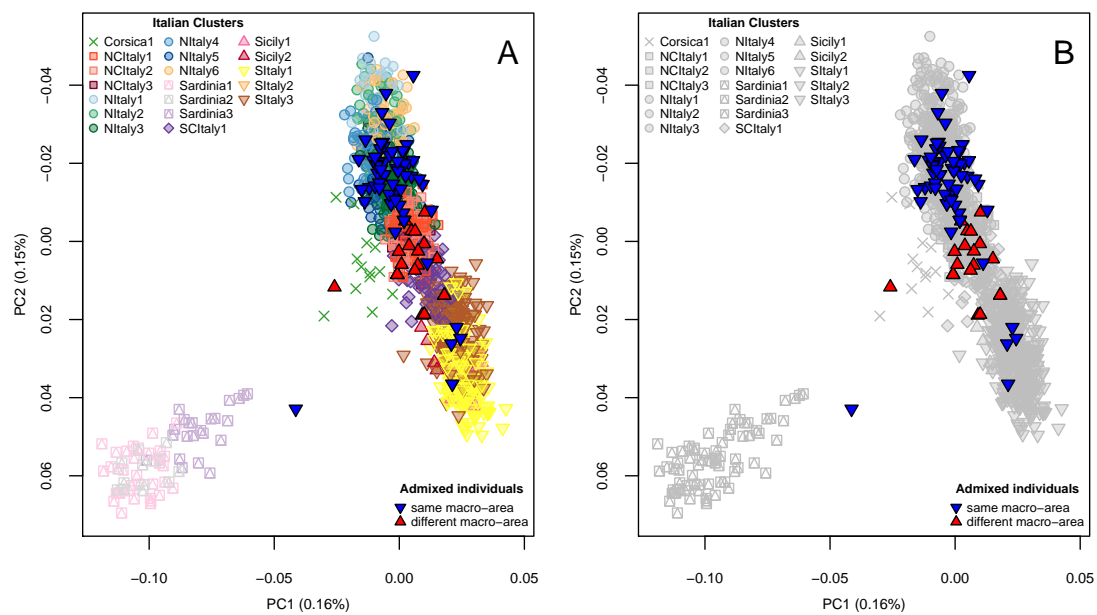

**Fig. S6. PCA with Admixed Italian individuals.**

Individuals with parents known to be born in two different macro-areas (see Materials and Methods, Supplementary materials - Cluster Self-Copy analysis) are plotted in red together with all the other Italian individuals, these coloured according either to the clusters they belong to (A) or in grey (B). Macro-areas are separated in Northern and Southern, where the central regions of Tuscany and Emilia are considered as part of the Northern macroarea and Latium, Abruzzo, Marche and Sardinia were considered as part of the Southern macro-area.

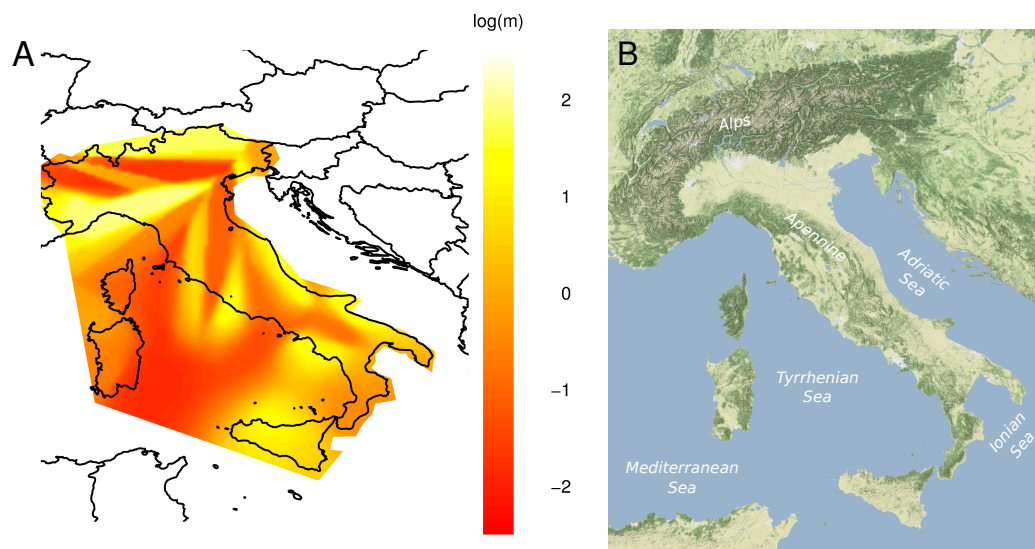

**Fig. S7. Results of the EEMS analysis on Italy-only populations.**

A) Colours represent the log<sub>10</sub> scale of the effective migration rate from low (red) to high (yellow). Samples as reported in table S1. B) Physical map of Italy.

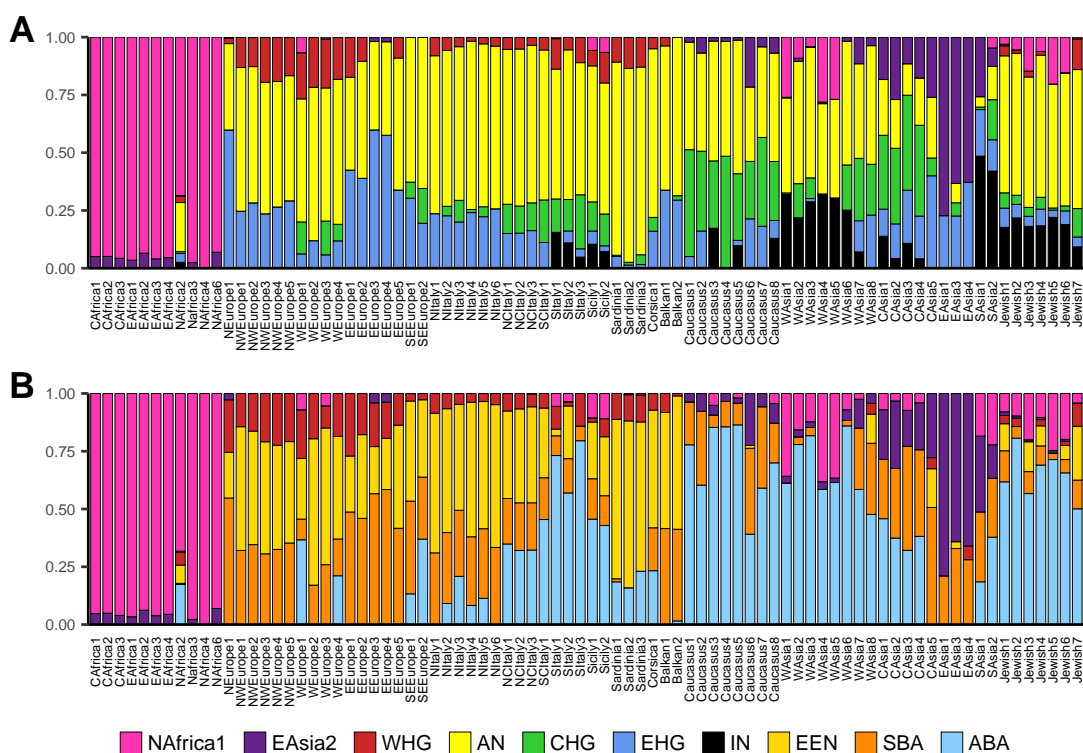

**Fig. S8. CP/NNLS results for *Uitimate* and *emphProximate* sources for all modern clusters.**  
A) *Uitimate* (A) and *Proximate* (B) sources analysis reporting all modern Eurasian and African clusters and including WHG among the sources (main text; Supplementary Material).



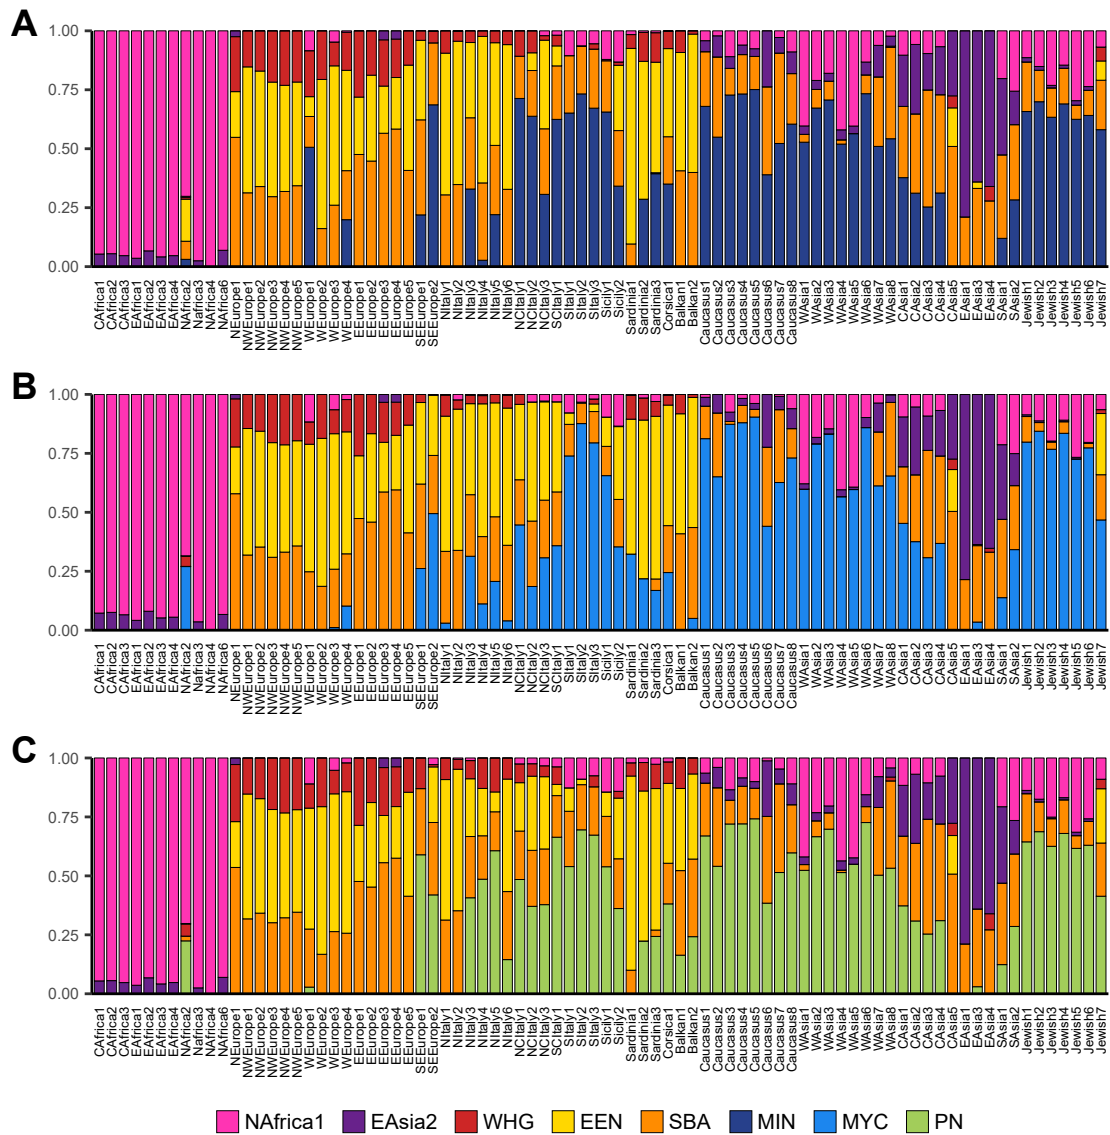

**Fig. S9.** CP/NNLS results for *emphProximate* sources for all modern clusters using alternative SEE sources.

*Proximate* sources analysis replacing ABA with alternative SEE sources: A) Minoan, MIN; B) Mycenaean, MYC; C) Peloponnese Neolithic, PN. In all the analyses, WHG was included among the possible sources (Supplementary Material).

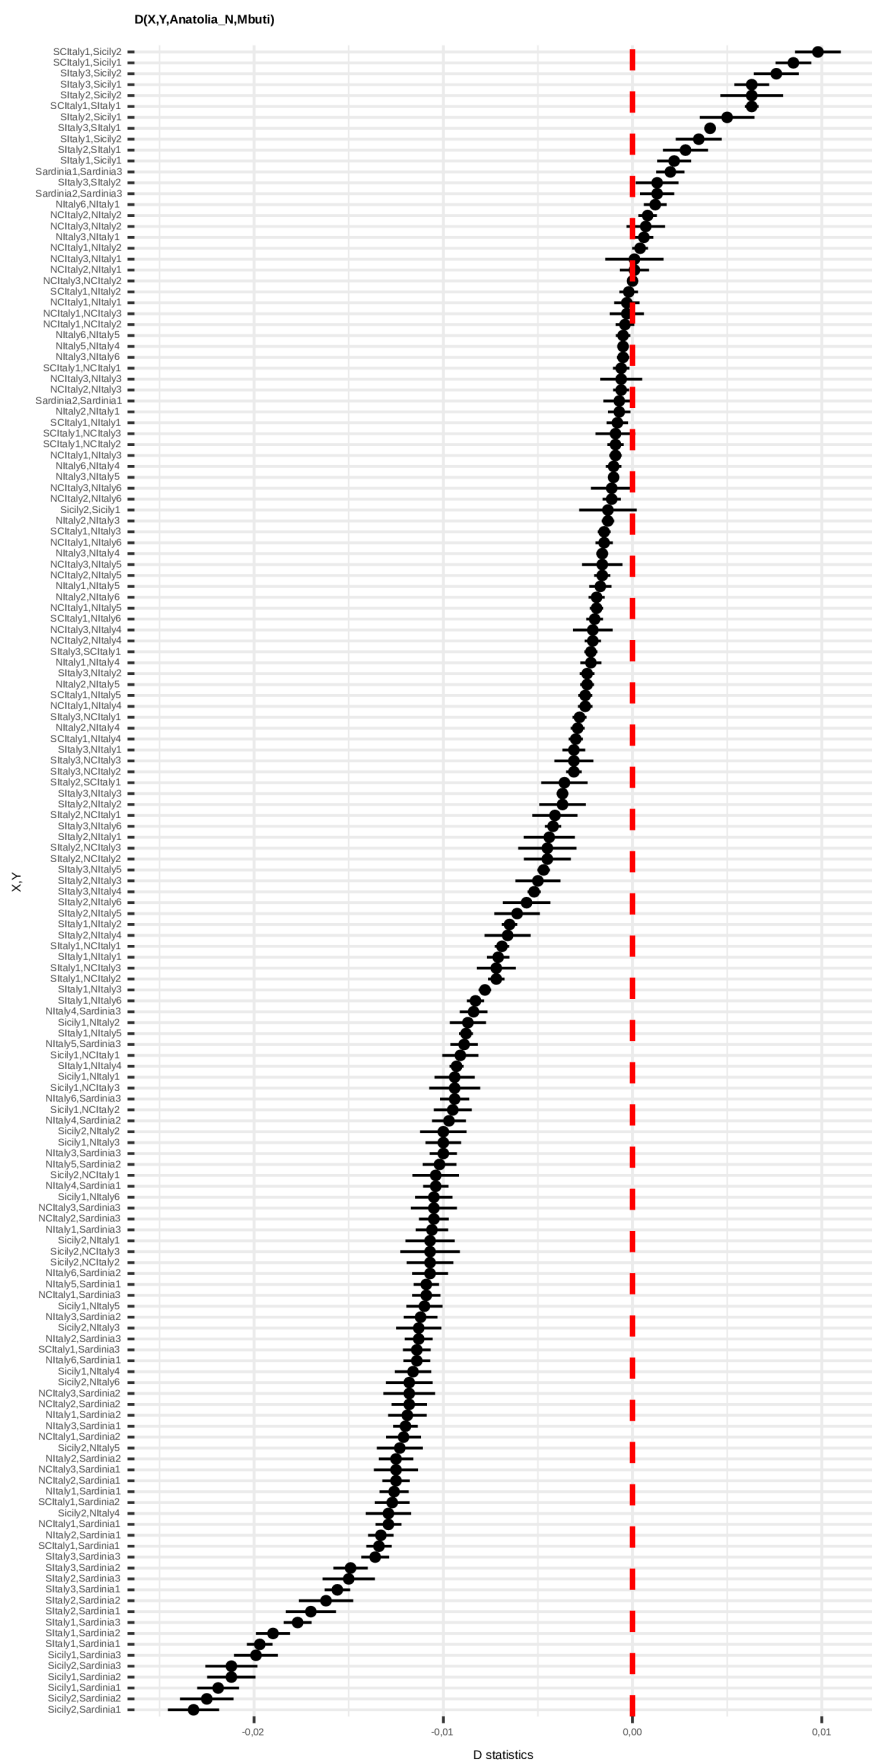

Fig. S10. D statistics in the form  $D(X,Y, AN,Mbuti)$  for all the possible pairs of Italian clusters.

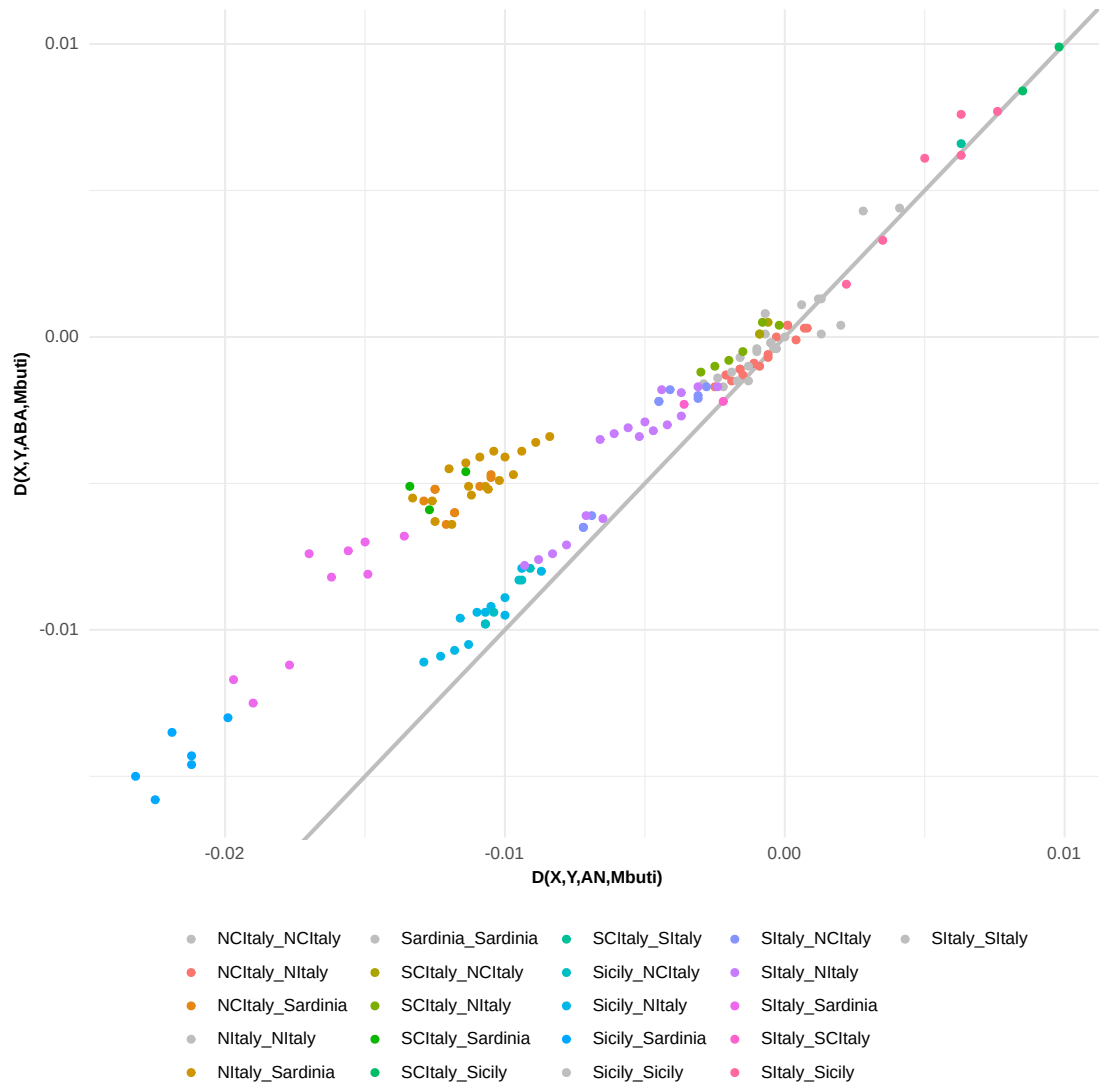

**Fig. S11. Comparison of AN and ABA affinity to Italian clusters using D-statistics.** Scatter plot of  $D(\text{Ita1}, \text{Ita2}, \text{AN}, \text{Mbuti})$  and  $D(\text{Ita1}, \text{Ita2}, \text{ABA}, \text{Mbuti})$  for all the Italian clusters. Points for pairs of clusters from the same (grey points) or closely related geographic location fall in proximity of the grey line, reflecting a similar affinity to AN (x-axis) and ABA (y-axis). Comparisons of clusters from NItaly/Sardinia and SItaly/Sicily fall above the grey line, reflecting a closer affinity of the latter to ABA.

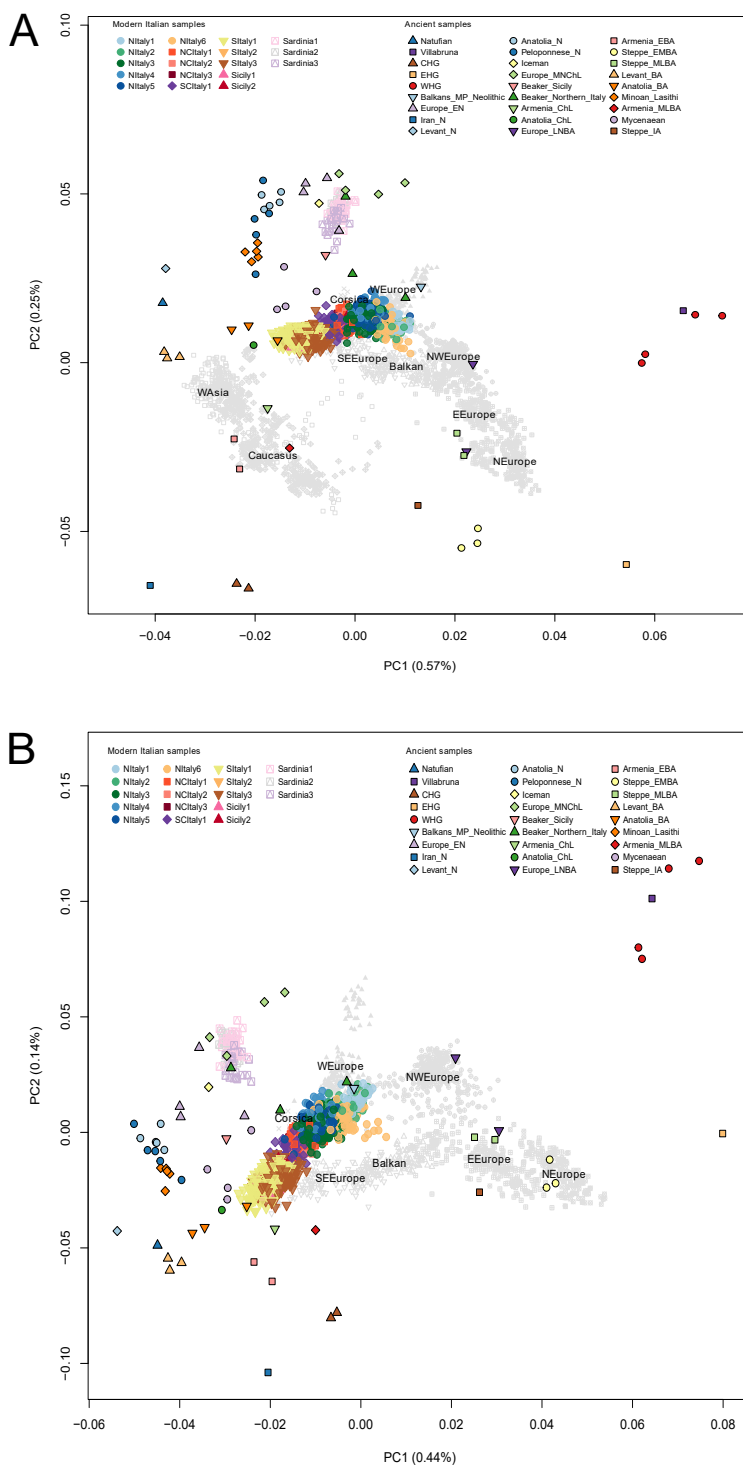

**Fig. S12. Principal component analysis projecting 63 ancient individuals onto the components inferred from modern individuals.** A) Principal component analysis projecting 63 ancient individuals onto the components inferred from 3,282 modern individuals assigned, through a CP/fS analysis, to European West Asian and Caucasian clusters (data file S2). B) Principal component analysis projecting 63 ancient individuals onto the components inferred from 2,469 modern individuals assigned, through a CP/fS analysis, to European clusters (data file S2). The labels are placed at the centroid of the macroarea. The centroids are calculated by computing the means of the coordinates of individuals in modern clusters within each macroarea.

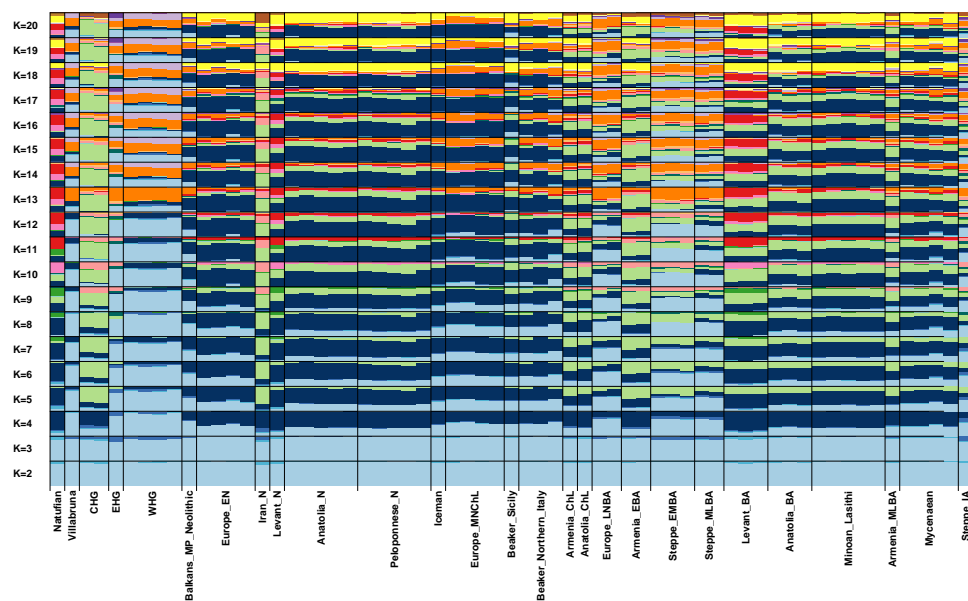

**Fig. S13. ADMIXTURE analysis of 63 ancient samples.**

Ancestral allele frequencies were inferred from ten different ADMIXTURE runs on 4,606 modern samples and projected onto the ancient samples. Each bar represents an individual grouped into ancient groups (data file S1).

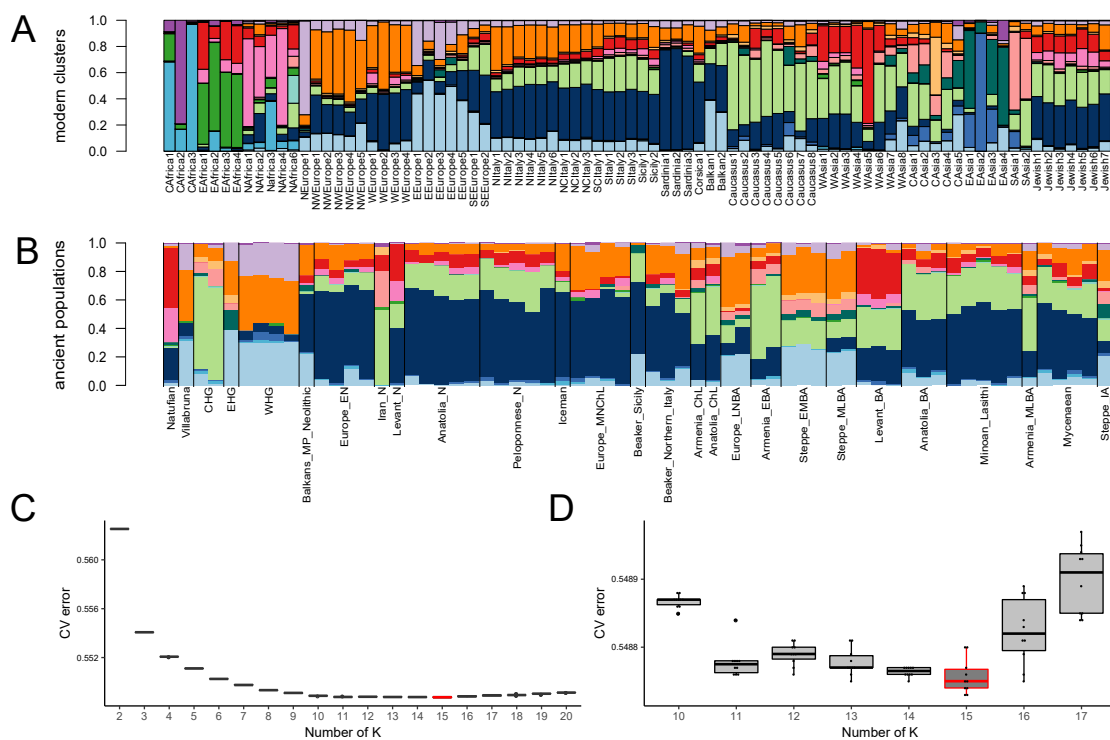

**Fig. S14. ADMIXTURE analysis of 63 ancient samples and 4,606 modern samples for K=15.**  
A-B) Results of the ADMIXTURE analysis as in fig. S4 and fig. S13 for K=15 including both modern (A) and ancient samples (B). C) Box plots of the ten CV-errors of each K from 2 to 20. D) Detailed box plots for the ten CV-errors for each K from 10 to 17.

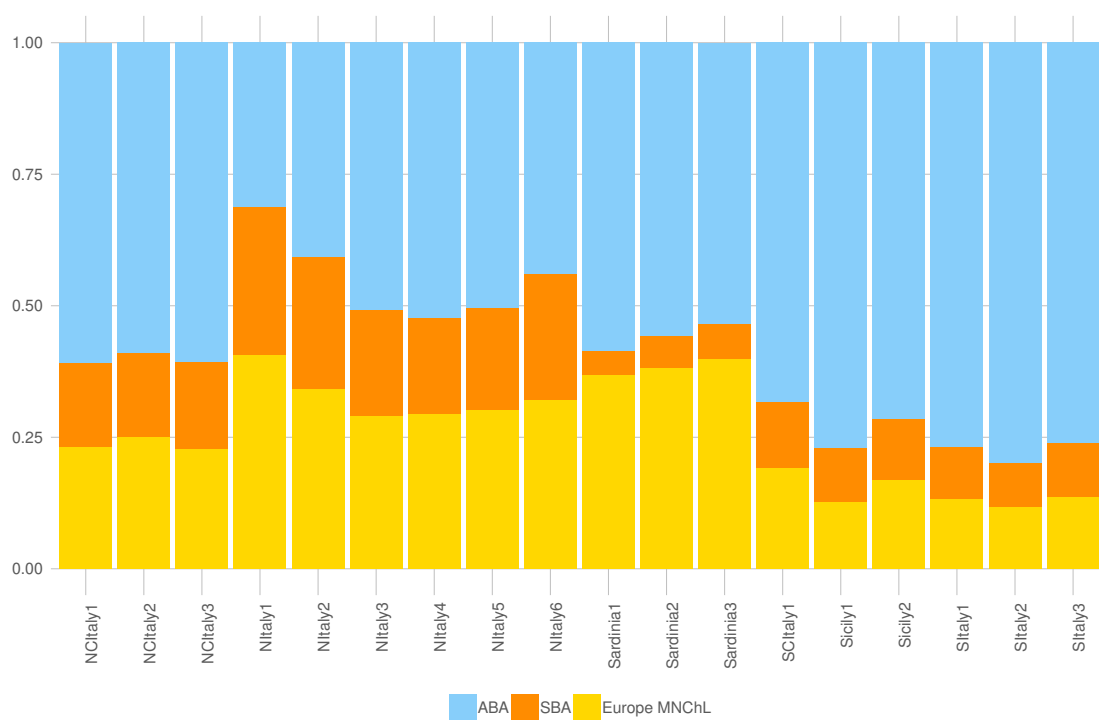

**Fig. S15. Mixture proportions on modern Italian clusters inferred by qpAdm as a combination of ABA, SBA and European Middle-Neolithic/Chalcolithic.**

For each tested cluster, we have evaluated all the possible combinations of N “left” sources with  $N=\{2..5\}$ , and one set of right/left Outgroups (Supplementary materials).

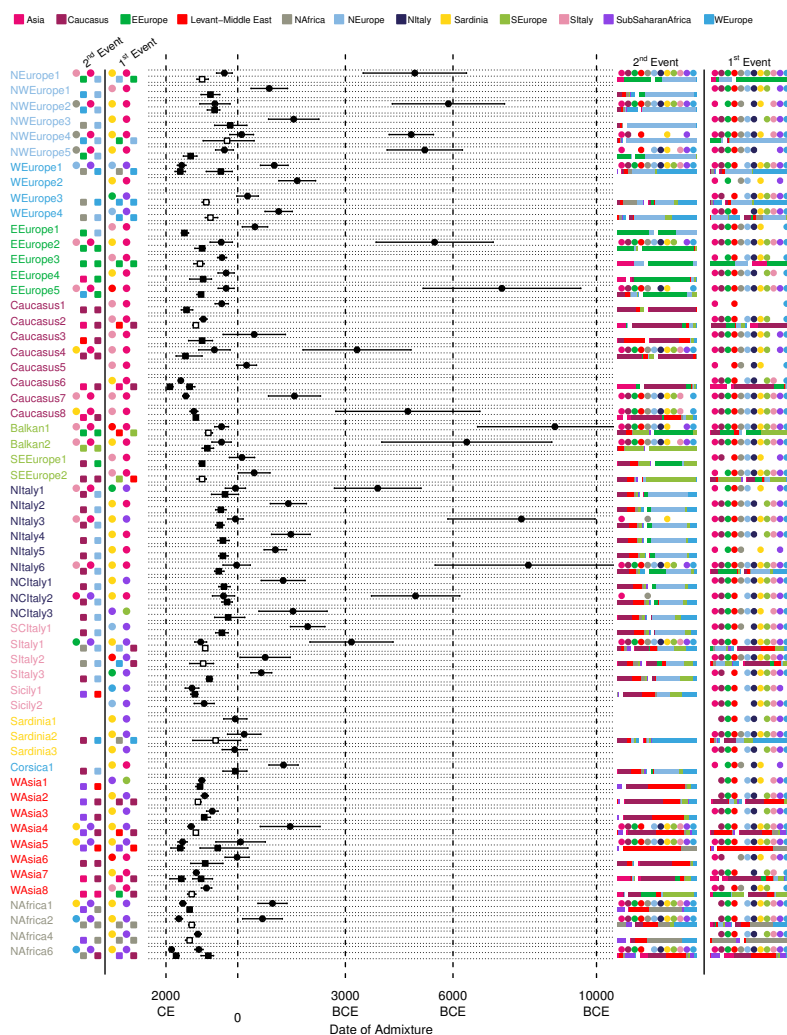

**Fig. S16. GT and MALDER analyses for all the Eurasian and North African clusters.**

Dates of the events inferred by “noItaly” GT (squares) and MALDER (circles) for clusters as in Fig. 1A and data file S2 are reported in the central part of the plot; lines encompassed the 95% CI for GT and  $\pm 1$  Standard Error for MALDER. GT events were distinguished in “one date” (black squares; 1D in table S7), “one date multiway” (white squares; 1MW) or “two events” (two black squares; 2D). The best sources are indicated in a staggered way as circles and squares for MALDER and GT, respectively (“1<sup>st</sup>/2<sup>nd</sup> event” columns, on the left; four sources are highlighted for 1MW events). Colours refer to the ancestry to which the sources were assigned (see Materials and Methods; Supplementary materials). We additionally included a sub-Saharan African ancestry comprising CAfrica and EAfrica clusters (Fig. S2, data file S2). GT sources for single date events are plotted in the column “2<sup>nd</sup> event”, as overlapping with second events detected by MALDER. The composition of the sources for GT and the geographical regions of the sources in MALDER, for which no significant differences in the amplitude of the fitted curve were found, are reported in the “1<sup>st</sup>/2<sup>nd</sup> event” columns on the right. GT sources are divided by a white space; the length of the bars indicates the contribution of each source; for 1MW events, two bar plots are indicated in the “1<sup>st</sup>/2<sup>nd</sup> event” columns on the right.



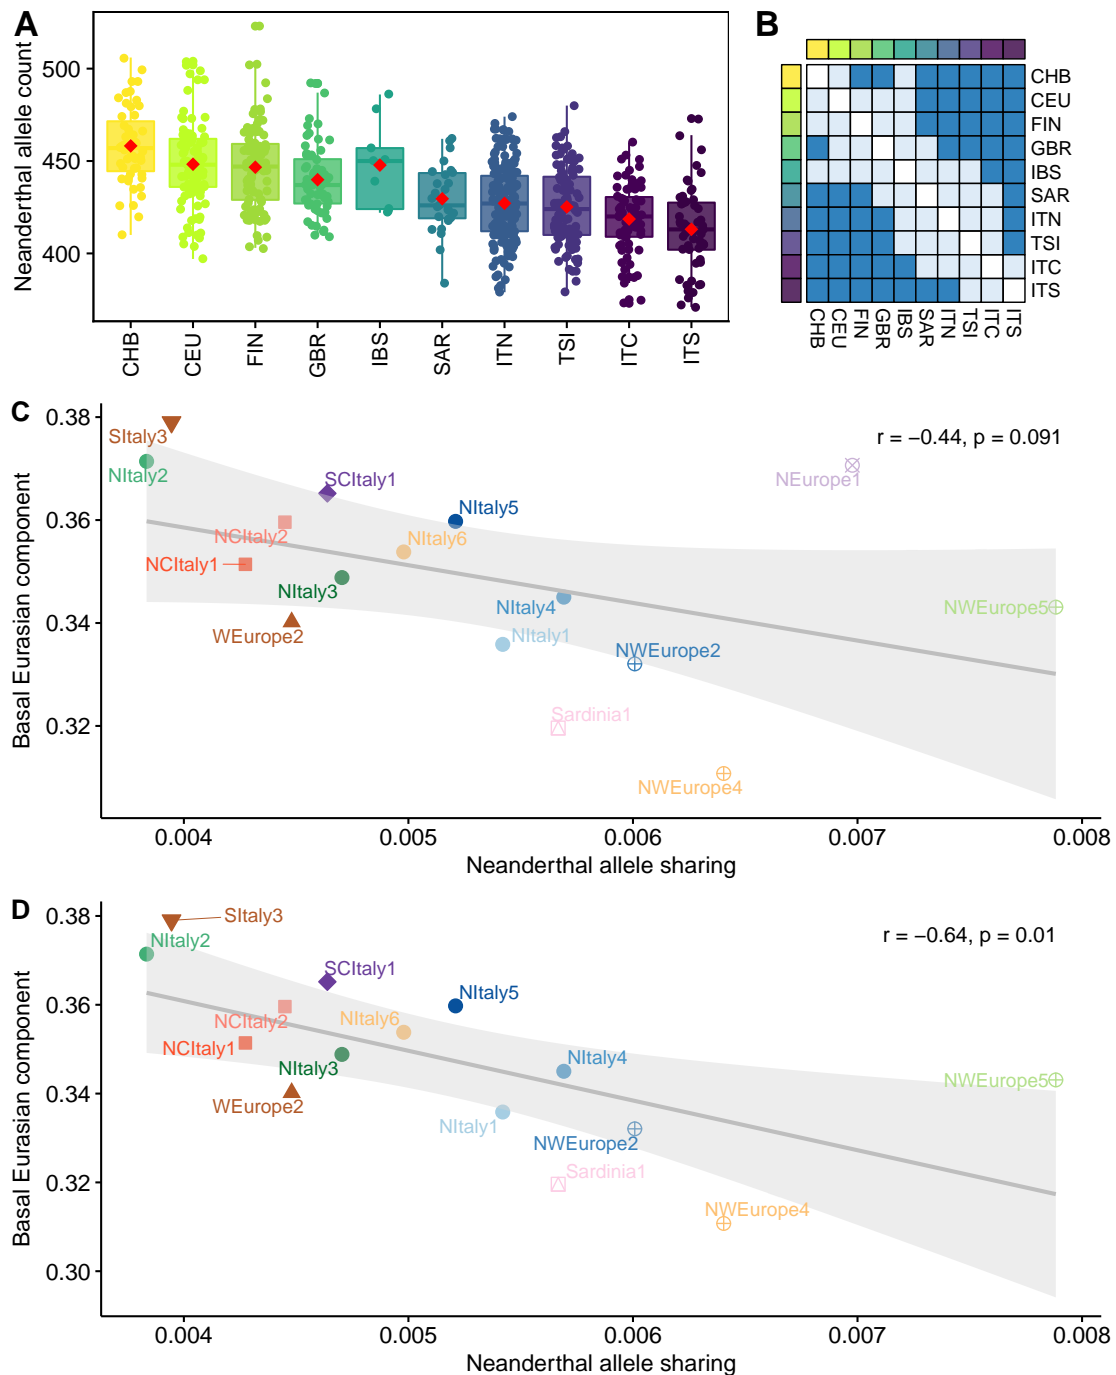

**Fig. S17. Exploring the relationship between Neanderthal ancestry and admixture with African sources.**

Same as in Fig. 4A, B, C but removing either the individuals belonging to clusters where the GT analysis identified signatures of African admixture (clusters SItaly1, SItaly2, Sicily1, Sardinia2, NWEurope3, WEurope1, WEurope3 and WEurope4, Figure 3 and fig. S16) or the whole set of the clusters listed above (see Supplementary materials). Specifically: A) Neanderthal allele counts in individuals from Eurasian populations, on 3,969 LD-pruned Neanderthal tag-SNPs; B) Matrix of significances based on Wilcoxon rank sum test between pairs of populations including (lower triangular matrix) and removing (upper) outliers (dark blue: adj p-value < 0.05; light blue: adj p-value > 0.05). C) Correlation between Neanderthal ancestry proportions and the amount of Basal Eurasian ancestry in European clusters. D) Same as C) but removing the cluster NEurope1 (see Supplementary Materials). Clusters with less than 10 individuals were excluded in C and D.

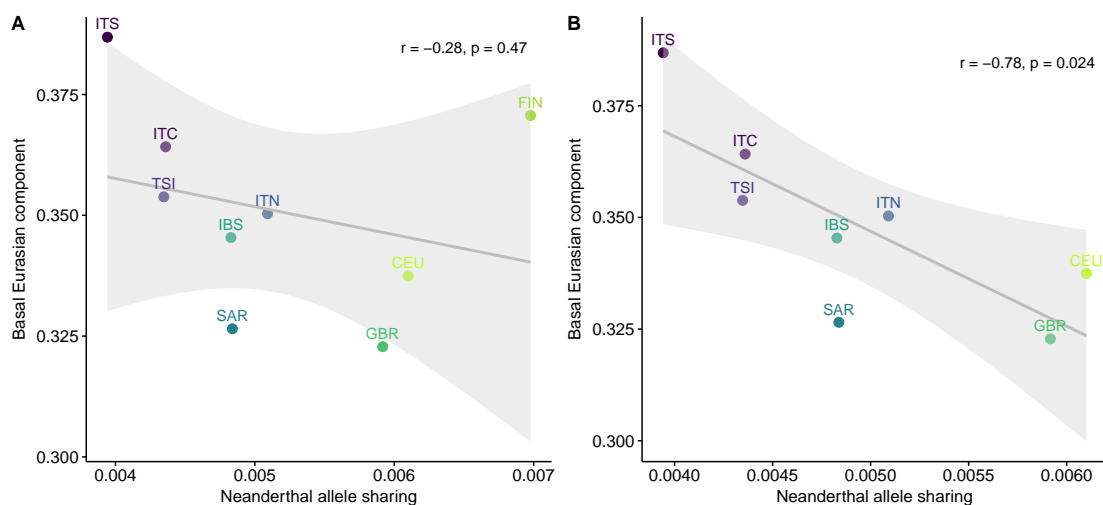

**Fig. S18. Correlation between the proportion of Neanderthal allele sharing and the amount of ancestry derived from a Basal Eurasian population in European populations.**

A) Correlation considering FIN (Finnish in Finland) population. B) Correlation excluding FIN (Finnish in Finland) population (see Materials and Methods, Supplementary materials).

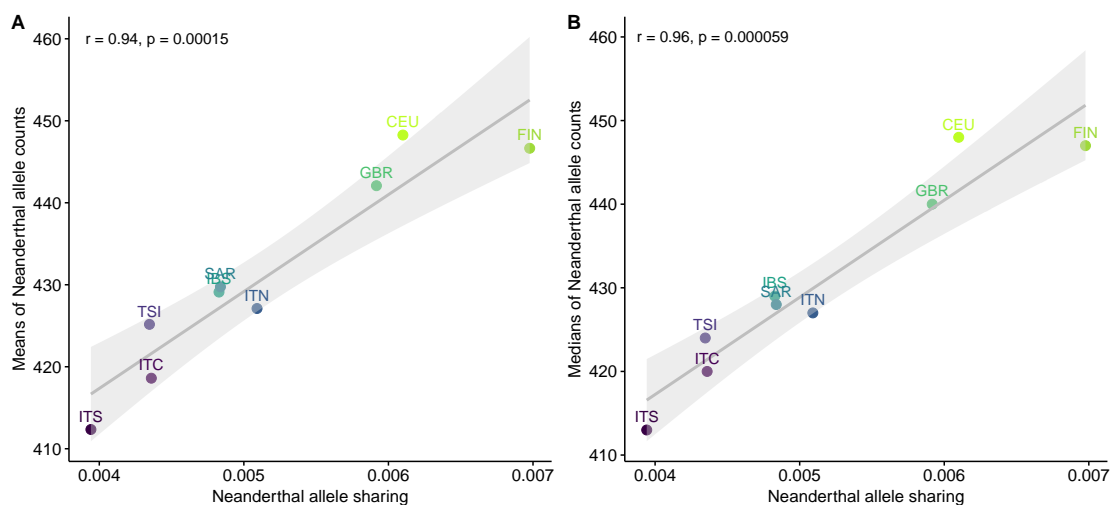

**Fig. S19. Correlation between the proportions of Neanderthal allele sharing computed with F4-ratio and the counts per population of Neanderthal alleles in European populations.**

A) Correlation between the proportions of Neanderthal allele sharing computed with F4-ratio and the means per population of Neanderthal allele counts. B) Correlation between the proportion of Neanderthal allele sharing computed with F4-ratio and the medians per population of Neanderthal allele counts.

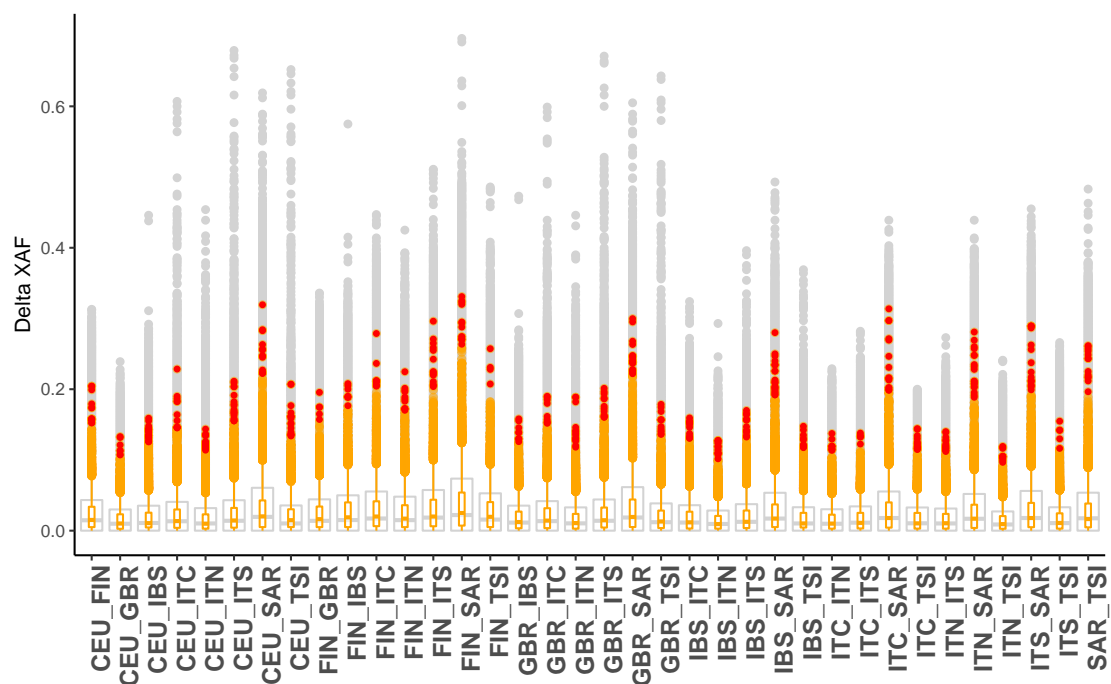

**Fig. S20. Absolute allele frequency differences ( $\Delta$ XAF, where X is the minor allele for each SNP or the Neanderthal allele when considering Neanderthal regions tag-SNPs) for each pair of European populations.**

We reported in grey the boxplot representing the total distributions of the variants, and in orange the distribution of Neanderthal inherited variants. The red dots are the Neanderthal SNPs in the top 1% of the distributions, as also reported in data file S4.
